# Supplementary material for: Mechanisms of sorafenib-induced cardiotoxicity: ER stress induces upregulation of ATF3, leading to downregulation of NDUFS1 expression and mitochondrial dysfunction
Source: Front Pharmacol. 2025 Aug 13;16:1593290. doi: 10.3389/fphar.2025.1593290 (PMC12380775; doi:10.3389/fphar.2025.1593290)
Supplement: Supplementary file 12 [file Table5.xlsx]

## Sheet: treatment groups 
Detailed information on treatment groups
Human	Drug concentration	treatment time (hrs)	GEO	Well
A SOR Rep 1 [SOR_A_6_5_1_C12]	2.5uM	48	GSM4364858	well: C12
A SOR Rep 2 [SOR_A_7_3_1_E5]	0.5uM	48	GSM4364860	well: E5
A SOR Rep 3 [SOR_A_7_4_1_E6]	0.5uM	48	GSM4364861	well: E6
A SOR Rep 4 [SOR_A_8_2_1_F12]	0.5uM	48	GSM4364862	well: F12
A CTRL Rep 1 [CTRL_A_4_1_1_A8]	0nM	48	GSM4364842	well: A8
A CTRL Rep 2 [CTRL_A_4_3_1_A10]	0nM	48	GSM4364844	well: A10
A CTRL Rep 3 [CTRL_A_5_1_1_B11]	0nM	48	GSM4364845	well: B11
A CTRL Rep 4 [CTRL_A_5_2_1_B12]	0nM	48	GSM4364846	well: B12
A CTRL Rep 5 [CTRL_A_5_2_1_H10]	0nM	48	GSM4364855	well: H10
A CTRL Rep 6 [CTRL_A_5_2_1_H9]	0nM	48	GSM4364854	well: H9
A CTRL Rep 7 [CTRL_A_5_3_1_C1]	0nM	48	GSM4364847	well: C1
A CTRL Rep 8 [CTRL_A_6_1_1_C9]	0nM	48	GSM4364848	well: C9
A CTRL Rep 9 [CTRL_A_6_2_1_C10]	0nM	48	GSM4364849	well: C10
A CTRL Rep 10 [CTRL_A_6_3_1_C11]	0nM	48	GSM4364850	well: C11
A CTRL Rep 11 [CTRL_A_7_1_1_E3]	0nM	48	GSM4364851	well: E3
A CTRL Rep 12 [CTRL_A_7_2_1_E4]	0nM	48	GSM4364852	well: E4
A CTRL Rep 13 [CTRL_A_8_1_1_F11]	0nM	48	GSM4364853	well: F11
B SOR Rep 1 [SOR_B_21_2_5_A19]	1uM	48	GSM4365294	well: A19
B SOR Rep 2 [SOR_B_53_20_5_E8]	1uM	48	GSM4365295	well: E8
B SOR Rep 3 [SOR_B_67_15_5_H3]	1uM	48	GSM4365296	well: H3
B SOR Rep 4 [SOR_B_72_15_5_I9]	1uM	48	GSM4365297	well: I9
B CTRL Rep 1 [CTRL_B_18_1_5_J21]	0nM	48	GSM4365282	well: J21
B CTRL Rep 2 [CTRL_B_44_1_5_D2]	0nM	48	GSM4365283	well: D2
B CTRL Rep 3 [CTRL_B_64_1_5_G5]	0nM	48	GSM4365284	well: G5
B CTRL Rep 4 [CTRL_B_67_1_5_G21]	0nM	48	GSM4365285	well: G21
B CTRL Rep 5 [CTRL_B_74_1_5_I18]	0nM	48	GSM4365286	well: I18
B CTRL Rep 6 [CTRL_B_82_1_5_L18]	0nM	48	GSM4365287	well: L18
B CTRL Rep 7 [CTRL_B_84_1_5_M12]	0nM	48	GSM4365288	well: M12
B CTRL Rep 8 [CTRL_B_95_1_5_P12]	0nM	48	GSM4365289	well: P12
D SOR Rep 1 [SOR_D_19_3_4_B16]	1uM	48	GSM4365086	well: B16
D SOR Rep 2 [SOR_D_25_2_4_C19]	1uM	48	GSM4365087	well: C19
D SOR Rep 3 [SOR_D_30_11_4_D22]	1uM	48	GSM4365088	well: D22
D CTRL Rep 2 [CTRL_D_13_2_4_B3]	0nM	48	GSM4365034	well: B3
D CTRL Rep 3 [CTRL_D_15_1_4_B10]	0nM	48	GSM4365035	well: B10
D CTRL Rep 4 [CTRL_D_19_1_4_B15]	0nM	48	GSM4365036	well: B15
D CTRL Rep 5 [CTRL_D_25_1_4_C18]	0nM	48	GSM4365037	well: C18
D CTRL Rep 6 [CTRL_D_28_1_4_D8]	0nM	48	GSM4365038	well: D8
D CTRL Rep 7 [CTRL_D_30_1_4_D20]	0nM	48	GSM4365039	well: D20
D CTRL Rep 13 [CTRL_D_48_2_4_O10]	0nM	48	GSM4365045	well: O10
E SOR Rep 1 [SOR_E_27_12_4_D4]	1uM	48	GSM4365191	well: D4
E SOR Rep 3 [SOR_E_45_18_4_N1]	1uM	48	GSM4365193	well: N1
E SOR Rep 4 [SOR_E_47_10_4_O1]	1uM	48	GSM4365194	well: O1
E CTRL Rep 1 [CTRL_E_26_1_4_C22]	0nM	48	GSM4365134	well: C22
E CTRL Rep 2 [CTRL_E_27_1_4_D2]	0nM	48	GSM4365135	well: D2
E CTRL Rep 3 [CTRL_E_29_1_4_D11]	0nM	48	GSM4365136	well: D11
E CTRL Rep 4 [CTRL_E_32_1_4_E17]	0nM	48	GSM4365137	well: E17
E CTRL Rep 5 [CTRL_E_34_1_4_F4]	0nM	48	GSM4365138	well: F4
E CTRL Rep 6 [CTRL_E_36_1_4_F10]	0nM	48	GSM4365139	well: F10
E CTRL Rep 7 [CTRL_E_37_1_4_F19]	0nM	48	GSM4365140	well: F19
E CTRL Rep 8 [CTRL_E_37_2_4_F20]	0nM	48	GSM4365141	well: F20
E CTRL Rep 9 [CTRL_E_41_1_4_I24]	0nM	48	GSM4365142	well: I24
E CTRL Rep 10 [CTRL_E_41_2_4_J1]	0nM	48	GSM4365143	well: J1
E CTRL Rep 12 [CTRL_E_43_2_4_L4]	0nM	48	GSM4365145	well: L4
