# Supplementary material for: Mechanisms of sorafenib-induced cardiotoxicity: ER stress induces upregulation of ATF3, leading to downregulation of NDUFS1 expression and mitochondrial dysfunction
Source: Front Pharmacol. 2025 Aug 13;16:1593290. doi: 10.3389/fphar.2025.1593290 (PMC12380775; doi:10.3389/fphar.2025.1593290)
Supplement: Supplementary file 13 [file Table7.xlsx]

## Sheet: Sheet1
GeneID	Symbol	Aliases	description
3309	HSPA5	BIP, GRP78, HEL-S-89n	heat shock protein family A (Hsp70) member 5
9709	HERPUD1	HERP, Mif1, SUP	homocysteine inducible ER protein with ubiquitin like domain 1
9451	EIF2AK3	PEK, PERK, WRS	eukaryotic translation initiation factor 2 alpha kinase 3
811	CALR	CRT, HEL-S-99n, RO, SSA, cC1qR	calreticulin
488	ATP2A2	ATP2B, DAR, DD, SERCA2	ATPase sarcoplasmic/endoplasmic reticulum Ca2+ transporting 2
2081	ERN1	IRE1, IRE1P, IRE1a, hIRE1p	endoplasmic reticulum to nucleus signaling 1
7184	HSP90B1	ECGP, GP96, GRP94, HEL-S-125m, HEL35, TRA1	heat shock protein 90 beta family member 1
7157	TP53	BCC7, BMFS5, LFS1, P53, TRP53	tumor protein p53
30001	ERO1A	ERO1-L, ERO1-L-alpha, ERO1-alpha, ERO1L, ERO1LA, Ero1alpha	endoplasmic reticulum oxidoreductase 1 alpha
1432	MAPK14	CSBP, CSBP1, CSBP2, CSPB1, EXIP, Mxi2, PRKM14, PRKM15, RK, SAPK2A, p38, p38ALPHA	mitogen-activated protein kinase 14
27230	SERP1	RAMP4	stress associated endoplasmic reticulum protein 1
2923	PDIA3	ER60, ERp57, ERp60, ERp61, GRP57, GRP58, HEL-S-269, HEL-S-93n, HsT17083, P58, PI-PLC	protein disulfide isomerase family A member 3
5599	MAPK8	JNK, JNK-46, JNK1, JNK1A2, JNK21B1/2, PRKM8, SAPK1, SAPK1c	mitogen-activated protein kinase 8
8878	SQSTM1	A170, DMRV, FTDALS3, NADGP, OSIL, PDB3, ZIP3, p60, p62, p62B	sequestosome 1
51752	ERAP1	A-LAP, ALAP, APPILS, ARTS-1, ARTS1, ERAAP, ERAAP1, PILS-AP, PILSAP	endoplasmic reticulum aminopeptidase 1
340061	STING1	ERIS, MITA, MPYS, NET23, SAVI, STING, STING-beta, TMEM173, hMITA, hSTING	stimulator of interferon response cGAMP interactor 1
5071	PRKN	AR-JP, LPRS2, PARK2, PDJ	parkin RBR E3 ubiquitin protein ligase
27429	HTRA2	MGCA8, OMI, PARK13, PRSS25	HtrA serine peptidase 2
222068	TMED4	ERS25, GMP25iso, HNLF, p24a3, p24alpha3	transmembrane p24 trafficking protein 4
120892	LRRK2	AURA17, DARDARIN, PARK8, RIPK7, ROCO2	leucine rich repeat kinase 2
3998	LMAN1	ERGIC-53, ERGIC53, F5F8D, FMFD1, MCFD1, MR60, gp58	lectin, mannose binding 1
351	APP	AAA, ABETA, ABPP, AD1I, CTFgamma, CVAP, PN-II, PN2, alpha-sAPP, preA4, APP	amyloid beta precursor protein
468	ATF4	CREB-2, CREB2, TAXREB67, TXREB	activating transcription factor 4
5743	PTGS2	COX-2, COX2, GRIPGHS, PGG/HS, PGHS-2, PHS-2, hCox-2	prostaglandin-endoperoxide synthase 2
10130	PDIA6	ERP5, P5, TXNDC7	protein disulfide isomerase family A member 6
100507436	MICA	MIC-A, PERB11.1	MHC class I polypeptide-related sequence A
54431	DNAJC10	ERdj5, JPDI, MTHr, PDIA19	DnaJ heat shock protein family (Hsp40) member C10
5611	DNAJC3	ACPHD, ERdj6, HP58, P58, P58IPK, PRKRI, p58(IPK)	DnaJ heat shock protein family (Hsp40) member C3
10961	ERP29	C12orf8, ERp28, ERp31, HEL-S-107, PDI-DB, PDIA9	endoplasmic reticulum protein 29
596	BCL2	Bcl-2, PPP1R50	BCL2 apoptosis regulator
487	ATP2A1	ATP2A, SERCA1	ATPase sarcoplasmic/endoplasmic reticulum Ca2+ transporting 1
4780	NFE2L2	HEBP1, IMDDHH, NRF2, Nrf-2	NFE2 like bZIP transcription factor 2
9919	SEC16A	KIAA0310, SEC16L, p250	SEC16 homolog A, endoplasmic reticulum export factor
581	BAX	BCL2L4	BCL2 associated X, apoptosis regulator
489	ATP2A3	SERCA3	ATPase sarcoplasmic/endoplasmic reticulum Ca2+ transporting 3
79139	DERL1	DER-1, DER1, derlin-1	derlin 1
23071	ERP44	PDIA10, TXNDC4	endoplasmic reticulum protein 44
10956	OS9	ERLEC2, OS-9	OS9 endoplasmic reticulum lectin
5663	PSEN1	ACNINV3, AD3, FAD, PS-1, PS1, PSNL1, S182	presenilin 1
1649	DDIT3	AltDDIT3, C/EBPzeta, CEBPZ, CHOP, CHOP-10, CHOP10, GADD153	DNA damage inducible transcript 3
11315	PARK7	DJ-1, DJ1, GATD2, HEL-S-67p	Parkinsonism associated deglycase
387923	SERP2	C13orf21, bA269C23.1	stress associated endoplasmic reticulum protein family member 2
9601	PDIA4	ERP70, ERP72, ERp-72	protein disulfide isomerase family A member 4
4189	DNAJB9	ERdj4, MDG-1, MDG1, MST049, MSTP049	DnaJ heat shock protein family (Hsp40) member B9
7466	WFS1	CTRCT41, WFRS, WFS, WFSL	wolframin ER transmembrane glycoprotein
7415	VCP	CDC48, FTDALS6, TERA, p97	valosin containing protein
64167	ERAP2	L-RAP, LRAP	endoplasmic reticulum aminopeptidase 2
51726	DNAJB11	ABBP-2, ABBP2, DJ9, Dj-9, EDJ, ERdj3, ERj3, ERj3p, PKD6, PRO1080, UNQ537	DnaJ heat shock protein family (Hsp40) member B11
10945	KDELR1	ERD2, ERD2.1, HDEL, PM23	KDEL endoplasmic reticulum protein retention receptor 1
348	APOE	AD2, APO-E, ApoE4, LDLCQ5, LPG	apolipoprotein E
64224	HERPUD2		HERPUD family member 2
493856	CISD2	ERIS, Miner1, NAF-1, WFS2, ZCD2	CDGSH iron sulfur domain 2
3162	HMOX1	HMOX1D, HO-1, HSP32, bK286B10	heme oxygenase 1
1080	CFTR	ABC35, ABCC7, CF/MRP, MRP7, TNR-CFTR, dJ760C5.1, CFTR	CF transmembrane conductance regulator
5601	MAPK9	JNK-55, JNK2, JNK2A, JNK2ALPHA, JNK2B, JNK2BETA, PRKM9, SAPK, SAPK1a, p54a, p54aSAPK	mitogen-activated protein kinase 9
1956	EGFR	ERBB, ERBB1, ERRP, HER1, NISBD2, PIG61, mENA	epidermal growth factor receptor
23411	SIRT1	SIR2, SIR2L1, SIR2alpha	sirtuin 1
6238	RRBP1	ES/130, ES130, RRp, hES, p180	ribosome binding protein 1
51060	TXNDC12	AG1, AGR1, ERP16, ERP18, ERP19, PDIA16, TLP19, hAG-1, hTLP19	thioredoxin domain containing 12
2475	MTOR	FRAP, FRAP1, FRAP2, RAFT1, RAPT1, SKS	mechanistic target of rapamycin kinase
25	ABL1	ABL, BCR-ABL, CHDSKM, JTK7, bcr/abl, c-ABL, c-ABL1, p150, v-abl	ABL proto-oncogene 1, non-receptor tyrosine kinase
10595	ERN2	IRE1-BETA, IRE1b, IRE2p, hIRE2p	endoplasmic reticulum to nucleus signaling 2
207	AKT1	AKT, PKB, PKB-ALPHA, PRKBA, RAC, RAC-ALPHA	AKT serine/threonine kinase 1
1965	EIF2S1	EIF-2, EIF-2A, EIF-2alpha, EIF2, EIF2A	eukaryotic translation initiation factor 2 subunit alpha
4690	NCK1	NCK, NCKalpha, nck-1	NCK adaptor protein 1
7124	TNF	DIF-alpha, TNFA, TNFSF2, TNLG1F, TNF	tumor necrosis factor
5578	PRKCA	AAG6, PKC-alpha, PKCA, PKCI+/-, PKCalpha, PRKACA	protein kinase C alpha
51614	ERGIC3	C20orf47, C2orf47, CGI-54, Erv46, NY-BR-84, PRO0989, SDBCAG84, dJ477O4.2	ERGIC and golgi 3
1051	CEBPB	C/EBP-beta, IL6DBP, NF-IL6, TCF5	CCAAT enhancer binding protein beta
81555	YIPF5	FinGER5, MEDS2, SB140, SMAP-5, SMAP5, YIP1A	Yip1 domain family member 5
56605	ERO1B	ERO1LB, Ero1beta	endoplasmic reticulum oxidoreductase 1 beta
7494	XBP1	TREB-5, TREB5, XBP-1, XBP2	X-box binding protein 1
6622	SNCA	NACP, PARK1, PARK4, PD1	synuclein alpha
9370	ADIPOQ	ACDC, ACRP30, ADIPQTL1, ADPN, APM-1, APM1, GBP28	adiponectin, C1Q and collagen domain containing
7422	VEGFA	MVCD1, VEGF, VPF	vascular endothelial growth factor A
7040	TGFB1	CED, DPD1, IBDIMDE, LAP, TGF-beta1, TGFB, TGFbeta	transforming growth factor beta 1
51435	SCARA3	APC7, CSR, CSR1, MSLR1, MSRL1	scavenger receptor class A member 3
673	BRAF	B-RAF1, B-raf-1, BRAF1, NS7, RAFB1, BRAF	B-Raf proto-oncogene, serine/threonine kinase
3569	IL6	BSF-2, BSF2, CDF, HGF, HSF, IFN-beta-2, IFNB2, IL-6	interleukin 6
5265	SERPINA1	A1A, A1AT, AAT, PI, PI1, PRO2275, alpha1AT, nNIF	serpin family A member 1
3630	INS	IDDM, IDDM1, IDDM2, ILPR, IRDN, MODY10, PNDM4	insulin
3028	HSD17B10	17b-HSD10, ABAD, CAMR, DUPXp11.22, ERAB, HADH2, HCD2, HSD10MD, MHBD, MRPP2, MRX17, MRX31, MRXS10, SCHAD, SDR5C1	hydroxysteroid 17-beta dehydrogenase 10
65018	PINK1	BRPK, PARK6	PTEN induced kinase 1
3091	HIF1A	HIF-1-alpha, HIF-1A, HIF-1alpha, HIF1, HIF1-ALPHA, MOP1, PASD8, bHLHe78	hypoxia inducible factor 1 subunit alpha
5034	P4HB	CLCRP1, DSI, ERBA2L, GIT, P4Hbeta, PDI, PDIA1, PHDB, PO4DB, PO4HB, PROHB	prolyl 4-hydroxylase subunit beta
27248	ERLEC1	C2orf30, CIM, CL24936, CL25084, HEL117, XTP3-B, XTP3TPB	endoplasmic reticulum lectin 1
3845	KRAS	C-K-RAS, C-K-RAS, CFC2, K-RAS2A, K-RAS2B, K-RAS4A, K-RAS4B, K-Ras, K-Ras 2, KI-RAS1, KRAS2, NS, NS3, OES, RALD, RASK2, c-Ki-ras, c-Ki-ras2, KRAS	KRAS proto-oncogene, GTPase
821	CANX	CNX, IP90, P90	calnexin
79956	ERMP1	FXNA, KIAA1815, bA207C16.3	endoplasmic reticulum metallopeptidase 1
4790	NFKB1	CVID12, EBP-1, KBF1, NF-kB, NF-kB1, NF-kappa-B1, NF-kappaB, NF-kappabeta, NFKB-p105, NFKB-p50, NFkappaB	nuclear factor kappa B subunit 1
3576	CXCL8	GCP-1, GCP1, IL8, LECT, LUCT, LYNAP, MDNCF, MONAP, NAF, NAP-1, NAP1, SCYB8	C-X-C motif chemokine ligand 8
3146	HMGB1	HMG-1, HMG1, HMG3, SBP-1	high mobility group box 1
5621	PRNP	ASCR, AltPrP, CD230, CJD, GSS, KURU, PRIP, PrP, PrP27-30, PrP33-35C, PrPc, p27-30	prion protein
57142	RTN4	ASY, NI220/250, NOGO, NSP, NSP-CL, Nbla00271, Nbla10545, RTN-X-A, RTN4-B1, RTN4-B2, RTN4-C, RTN4	reticulon 4
23645	PPP1R15A	GADD34	protein phosphatase 1 regulatory subunit 15A
3064	HTT	HD, IT15, LOMARS	huntingtin
5594	MAPK1	ERK, ERK-2, ERK2, ERT1, MAPK2, NS13, P42MAPK, PRKM1, PRKM2, p38, p40, p41, p41mapk, p42-MAPK	mitogen-activated protein kinase 1
857	CAV1	BSCL3, CGL3, LCCNS, MSTP085, PPH3, VIP21	caveolin 1
5770	PTPN1	PTP1B	protein tyrosine phosphatase non-receptor type 1
121506	ERP27	C12orf46, PDIA8	endoplasmic reticulum protein 27
6647	SOD1	ALS, ALS1, HEL-S-44, IPOA, SOD, STAHP, hSod1, homodimer	superoxide dismutase 1
4217	MAP3K5	ASK1, MAPKKK5, MEKK5	mitogen-activated protein kinase kinase kinase 5
3106	HLA-B	AS, B-4901, HLAB	major histocompatibility complex, class I, B
7099	TLR4	ARMD10, CD284, TLR-4, TOLL	toll like receptor 4
10134	BCAP31	6C6-AG, BAP31, CDM, DDCH, DXS1357E	B cell receptor associated protein 31
114548	NLRP3	AGTAVPRL, AII, AVP, C1orf7, CIAS1, CLR1.1, DFNA34, FCAS, FCAS1, FCU, KEFH, MWS, NALP3, PYPAF1	NLR family pyrin domain containing 3
10525	HYOU1	GRP-170, Grp170, HSP12A, IMD59, ORP-150, ORP150	hypoxia up-regulated 1
387	RHOA	ARH12, ARHA, EDFAOB, RHO12, RHOH12	ras homolog family member A
84447	SYVN1	DER3, HRD1	synoviolin 1
4137	MAPT	DDPAC, FTDP-17L, MSTD, MTBT1, MTBT2, PPND, PPP1R103, TAU, tau-40, MAPT	microtubule associated protein tau
5970	RELA	CMCU, NFKB3, p65	RELA proto-oncogene, NF-kB subunit
338	APOB	FCHL2, FLDB, LDLCQ4, apoB-100, apoB-48	apolipoprotein B
22926	ATF6	ACHM7A, ATF6	activating transcription factor 6
7009	TMBIM6	BAXI1, BI-1, TEGT	transmembrane BAX inhibitor motif containing 6
10018	BCL2L11	BAM, BIM, BOD	BCL2 like 11
8795	TNFRSF10B	CD262, DR5, KILLER, KILLER/DR5, TRAIL-R2, TRAILR2, TRICK2, TRICK2A, TRICK2B, TRICKB, ZTNFR9	TNF receptor superfamily member 10b
7450	VWF	F8VWF, VWD	von Willebrand factor
920	CD4	CD4mut, IMD79, OKT4D	CD4 molecule
3725	JUN	AP-1, AP1, c-Jun, cJUN, p39	Jun proto-oncogene, AP-1 transcription factor subunit
1499	CTNNB1	CTNNB, EVR7, MRD19, NEDSDV, armadillo	catenin beta 1
3303	HSPA1A	HEL-S-103, HSP70, HSP70-1, HSP70-1A, HSP70-2, HSP70.1, HSP70.2, HSP70I, HSP72, HSPA1	heat shock protein family A (Hsp70) member 1A
5728	PTEN	10q23del, BZS, CWS1, DEC, GLM2, MHAM, MMAC11, PTENbeta, TEP1, PTEN	phosphatase and tensin homolog
6774	STAT3	ADMIO, ADMIO1, APRF, HIES	signal transducer and activator of transcription 3
4609	MYC	MRTLC, bHLHe39, c-Myc, MYC	MYC proto-oncogene, bHLH transcription factor
1191	CLU	AAG4, APO-J, APOJ, CLI1, CLU2, KUB1, NA1/NA2, SGP-2, SGP2, SP-40, TRPM-2, TRPM2, CLU	clusterin
5371	PML	MYL, PP8675, RNF71, TRIM19	PML nuclear body scaffold
5311	PKD2	APKD2, PC2, PKD4, Pc-2, TRPP2	polycystin 2, transient receptor potential cation channel
5595	MAPK3	ERK-1, ERK1, ERT2, HS44KDAP, HUMKER1A, P44ERK1, P44MAPK, PRKM3, p44-ERK1, p44-MAPK	mitogen-activated protein kinase 3
4846	NOS3	ECNOS, eNOS	nitric oxide synthase 3
5879	RAC1	MIG5, MRD48, Rac-1, TC-25, p21-Rac1	Rac family small GTPase 1
213	ALB	FDAHT, HSA, PRO0883, PRO0903, PRO1341	albumin
2099	ESR1	ER, ESR, ESRA, ESTRR, Era, NR3A1	estrogen receptor 1
9217	VAPB	ALS8, VAMP-B, VAP-B	VAMP associated protein B and C
10059	DNM1L	DLP1, DRP1, DVLP, DYMPLE, EMPF, EMPF1, HDYNIV, OPA5	dynamin 1 like
6782	HSPA13	STCH	heat shock protein family A (Hsp70) member 13
672	BRCA1	BRCAI, BRCC1, BROVCA1, FANCS, IRIS, PNCA4, PPP1R53, PSCP, RNF53	BRCA1 DNA repair associated
5295	PIK3R1	AGM7, GRB1, IMD36, p85, p85-ALPHA	phosphoinositide-3-kinase regulatory subunit 1
255738	PCSK9	FH3, FHCL3, HCHOLA3, LDLCQ1, NARC-1, NARC1, PC9	proprotein convertase subtilisin/kexin type 9
7015	TERT	CMM9, DKCA2, DKCB4, EST2, PFBMFT1, TCS1, TP2, TRT, hEST2, hTRT	telomerase reverse transcriptase
3708	ITPR1	ACV, CLA4, INSP3R1, IP3R, IP3R1, PPP1R94, SCA15, SCA16, SCA29	inositol 1,4,5-trisphosphate receptor type 1
6786	STIM1	D11S4896E, GOK, IMD10, STRMK, TAM, TAM1	stromal interaction molecule 1
4318	MMP9	CLG4B, GELB, MANDP2, MMP-9	matrix metallopeptidase 9
7057	THBS1	THBS, THBS-1, TSP, TSP-1, TSP1	thrombospondin 1
578	BAK1	BAK, BAK-LIKE, BCL2L7, CDN1	BCL2 antagonist/killer 1
6714	SRC	ASV1, THC6, c-SRC, p60-Src, SRC	SRC proto-oncogene, non-receptor tyrosine kinase
598	BCL2L1	BCL-XL/S, BCL2L, BCLX, Bcl-X, PPP1R52	BCL2 like 1
54658	UGT1A1	BILIQTL1, GNT1, HUG-BR1, UDPGT, UDPGT 1-1, UGT1, UGT1A	UDP glucuronosyltransferase family 1 member A1
3479	IGF1	IGF, IGF-I, IGFI, MGF	insulin like growth factor 1
6469	SHH	HHG1, HLP3, HPE3, MCOPCB5, SMMCI, ShhNC, TPT, TPTPS	sonic hedgehog signaling molecule
3553	IL1B	IL-1, IL1-BETA, IL1F2, IL1beta	interleukin 1 beta
1026	CDKN1A	CAP20, CDKN1, CIP1, MDA-6, P21, SDI1, WAF1, p21CIP1	cyclin dependent kinase inhibitor 1A
1029	CDKN2A	ARF, CDK4I, CDKN2, CMM2, INK4, INK4A, MLM, MTS-1, MTS1, P14, P14ARF, P16, P16-INK4A, P16INK4, P16INK4A, P19, P19ARF, TP16	cyclin dependent kinase inhibitor 2A
1861	TOR1A	AMC5, DQ2, DYT1	torsin family 1 member A
55829	SELENOS	AD-015, ADO15, SBBI8, SELS, SEPS1, VIMP	selenoprotein S
1654	DDX3X	CAP-Rf, DBX, DDX14, DDX3, HLP2, MRX102, MRXSSB	DEAD-box helicase 3 X-linked
8440	NCK2	GRB4, NCKbeta	NCK adaptor protein 2
3791	KDR	CD309, FLK1, VEGFR, VEGFR2	kinase insert domain receptor
4988	OPRM1	LMOR, M-OR-1, MOP, MOR, MOR1, OPRM	opioid receptor mu 1
23162	MAPK8IP3	JIP-3, JIP3, JSAP1, NEDBA, SYD2, syd	mitogen-activated protein kinase 8 interacting protein 3
5580	PRKCD	ALPS3, CVID9, MAY1, PKCD, nPKC-delta	protein kinase C delta
2353	FOS	AP-1, C-FOS, p55	Fos proto-oncogene, AP-1 transcription factor subunit
7052	TGM2	G(h), TG(C), TGC, hTG2, tTG	transglutaminase 2
5444	PON1	ESA, MVCD5, PON	paraoxonase 1
4904	YBX1	BP-8, CBF-A, CSDA2, CSDB, DBPB, EFI-A, MDR-NF1, NSEP-1, NSEP1, YB-1, YB1	Y-box binding protein 1
2064	ERBB2	CD340, HER-2, HER-2/neu, HER2, MLN 19, MLN-19, NEU, NGL, TKR1, VSCN2, c-ERB-2, c-ERB2, p185(erbB2)	erb-b2 receptor tyrosine kinase 2
836	CASP3	CPP32, CPP32B, SCA-1	caspase 3
2308	FOXO1	FKH1, FKHRA, FOXO1	forkhead box O1
2932	GSK3B		glycogen synthase kinase 3 beta
4851	NOTCH1	AOS5, AOVD1, TAN1, hN1	notch receptor 1
472	ATM	AT1, ATA, ATC, ATD, ATDC, ATE, TEL1, TELO1	ATM serine/threonine kinase
8678	BECN1	ATG6, VPS30, beclin1	beclin 1
54106	TLR9	CD289	toll like receptor 9
367	AR	AIS8, DHTR, HUMARA, HYSP1, KD, NR3C4, SBMA, SMAX1, TFM, AR	androgen receptor
23435	TARDBP	ALS10, TDP-43	TAR DNA binding protein
154	ADRB2	ADRB2R, ADRBR, B2AR, BAR, BETA2AR	adrenoceptor beta 2
6721	SREBF2	SREBP-2, SREBP2, bHLHd2	sterol regulatory element binding transcription factor 2
4653	MYOC	GLC1A, GPOA, JOAG, JOAG1, TIGR	myocilin
1906	EDN1	ARCND3, ET1, HDLCQ7, PPET1, QME	endothelin 1
3952	LEP	LEPD, OB, OBS	leptin
4000	LMNA	CDCD1, CDDC, CMD1A, CMT2B1, EMD2, FPL, FPLD, FPLD2, HGPS, IDC, LDP1, LFP, LGMD1B, LMN1, LMNC, LMNL1, MADA, PRO1	lamin A/C
1588	CYP19A1	ARO, ARO1, CPV1, CYAR, CYP19, CYPXIX, P-450AROM	cytochrome P450 family 19 subfamily A member 1
3717	JAK2	JTK10	Janus kinase 2
50507	NOX4	KOX, KOX-1, RENOX	NADPH oxidase 4
2629	GBA1	GBA, GCB, GLUC	glucosylceramidase beta 1
335	APOA1	HPALP2, apo(a)	apolipoprotein A1
6347	CCL2	GDCF-2, HC11, HSMCR30, MCAF, MCP-1, MCP1, SCYA2, SMC-CF	C-C motif chemokine ligand 2
1994	ELAVL1	ELAV1, HUR, Hua, MelG	ELAV like RNA binding protein 1
595	CCND1	BCL1, D11S287E, PRAD1, U21B31	cyclin D1
3586	IL10	CSIF, GVHDS, IL-10A, TGIF, IL10	interleukin 10
2146	EZH2	ENX-1, ENX1b, KMT6, KMT6A, WVS, WVS2, EZH2	enhancer of zeste 2 polycomb repressive complex 2 subunit
2309	FOXO3	AF6q21, FKHRL1, FKHRL1P2, FOXO2A, FOXO3	forkhead box O3
64714	PDIA2	PDA2, PDI, PDIP, PDIR	protein disulfide isomerase family A member 2
328	APEX1	APE, APE1, APEN, APEX, APX, HAP1, REF1	apurinic/apyrimidinic endodeoxyribonuclease 1
1536	CYBB	AMCBX2, CGD, CGDX, GP91-1, GP91-PHOX, GP91PHOX, IMD34, NOX2, p91-PHOX	cytochrome b-245 beta chain
59272	ACE2	ACEH	angiotensin converting enzyme 2
9780	PIEZO1	DHS, FAM38A, LMPH3, LMPHM6, Mib	piezo type mechanosensitive ion channel component 1
3934	LCN2	24p3, MSFI, NGAL, p25	lipocalin 2
7186	TRAF2	MGC:45012, RNF117, TRAP, TRAP3	TNF receptor associated factor 2
2908	NR3C1	GCCR, GCR, GCRST, GR, GRL	nuclear receptor subfamily 3 group C member 1
1535	CYBA	CGD4, p22-PHOX	cytochrome b-245 alpha chain
10273	STUB1	CHIP, HSPABP2, NY-CO-7, SCA48, SCAR16, SDCCAG7, UBOX1	STIP1 homology and U-box containing protein 1
1471	CST3	ARMD11, HEL-S-2	cystatin C
2335	FN1	CIG, ED-B, FINC, FN, FNZ, GFND, GFND2, LETS, MSF, SMDCF	fibronectin 1
3458	IFNG	IFG, IFI, IMD69	interferon gamma
5664	PSEN2	AD3L, AD4, CMD1V, PS2, STM2	presenilin 2
5054	SERPINE1	PAI, PAI-1, PAI1, PLANH1	serpin family E member 1
1813	DRD2	D2DR, D2R	dopamine receptor D2
5310	PKD1	PBP, PC1, Pc-1, TRPP1	polycystin 1, transient receptor potential channel interacting
59341	TRPV4	BCYM3, CMT2C, HMSN2C, OTRPC4, SMAL, SPSMA, SSQTL1, TRP12, VRL2, VROAC	transient receptor potential cation channel subfamily V member 4
283234	CCDC88B	BRLZ, CCDC88, HKRP3, gipie	coiled-coil domain containing 88B
9817	KEAP1	INrf2, KLHL19	kelch like ECH associated protein 1
3417	IDH1	HEL-216, HEL-S-26, IDCD, IDH, IDP, IDPC, PICD	isocitrate dehydrogenase (NADP(+)) 1
183	AGT	ANHU, SERPINA8, hFLT1	angiotensinogen
177	AGER	RAGE, SCARJ1, sRAGE	advanced glycosylation end-product specific receptor
332	BIRC5	API4, EPR-1	baculoviral IAP repeat containing 5
837	CASP4	ICE(rel)II, ICEREL-II, ICH-2, Mih1, Mih1/TX, TX	caspase 4
5771	PTPN2	PTN2, PTPT, TC-PTP, TCELLPTP, TCPTP	protein tyrosine phosphatase non-receptor type 2
3123	HLA-DRB1	DRB1, HLA-DR1B, HLA-DRB, SS1	major histocompatibility complex, class II, DR beta 1
4170	MCL1	BCL2L3, EAT-ES, MCL1L, MCL1S, Mcl-1, TM, bcl2-L-3, mcl1/EAT, MCL1	MCL1 apoptosis regulator, BCL2 family member
11093	ADAMTS13	ADAM-TS13, ADAMTS-13, C9orf8, VWFCP, vWF-CP	ADAM metallopeptidase with thrombospondin type 1 motif 13
10280	SIGMAR1	ALS16, DSMA2, OPRS1, SIG-1R, SR-BP, SR-BP1, SRBP, hSigmaR1, sigma1R	sigma non-opioid intracellular receptor 1
355	FAS	ALPS1A, APO-1, APT1, CD951, FASTM, TNFRSF6, FAS	Fas cell surface death receptor
1543	CYP1A1	AHH, AHRR, CP11, CYP1, CYPIA1, P1-450, P450-C, P450DX	cytochrome P450 family 1 subfamily A member 1
5610	EIF2AK2	DYT33, EIF2AK1, LEUDEN, PKR, PPP1R83, PRKR	eukaryotic translation initiation factor 2 alpha kinase 2
185	AGTR1	AG2SB, AT1, AT1AR, AT1B, AT1BR, AT1R, AT2R1, HAT1R, AGTR1	angiotensin II receptor type 1
7412	VCAM1	CD106, INCAM-100	vascular cell adhesion molecule 1
5562	PRKAA1	AMPK, AMPK alpha 1, AMPKa1	protein kinase AMP-activated catalytic subunit alpha 1
1571	CYP2E1	CPE1, CYP2E, P450-J, P450C2E	cytochrome P450 family 2 subfamily E member 1
29126	CD274	B7-H, B7H1, PD-L1, PDCD1L1, PDCD1LG1, PDL1, hPD-L1	CD274 molecule
7428	VHL	HRCA1, RCA11, pVHL, VHL	von Hippel-Lindau tumor suppressor
2697	GJA1	AVSD3, CMDR, CX43, EKVP, EKVP3, GJAL, HLHS1, HSS, ODDD, PPKCA	gap junction protein alpha 1
998	CDC42	CDC42Hs, G25K, TKS	cell division cycle 42
2706	GJB2	BAPS, CX26, DFNA3, DFNA3A, DFNB1, DFNB1A, HID, KID, NSRD1, PPK	gap junction protein beta 2
8626	TP63	AIS, B(p51A), B(p51B), EEC3, KET, LMS, NBP, OFC8, RHS, SHFM4, TP53CP, TP53L, TP73L, p40, p51, p53CP, p63, p73H, p73L	tumor protein p63
1586	CYP17A1	CPT7, CYP17, P450C17, S17AH	cytochrome P450 family 17 subfamily A member 1
7852	CXCR4	CD184, D2S201E, FB22, HM89, HSY3RR, LAP-3, LAP3, LCR1, LESTR, NPY3R, NPYR, NPYRL, NPYY3R, WHIM, WHIMS, WHIMS1	C-X-C motif chemokine receptor 4
467	ATF3		activating transcription factor 3
999	CDH1	Arc-1, BCDS1, CD324, CDHE, ECAD, LCAM, UVO	cadherin 1
10551	AGR2	AG-2, AG2, GOB-4, HAG-2, HEL-S-116, HPC8, PDIA17, XAG-2	anterior gradient 2, protein disulphide isomerase family member
3320	HSP90AA1	EL52, HEL-S-65p, HSP86, HSP89A, HSP90A, HSP90N, HSPC1, HSPCA, HSPCAL1, HSPCAL4, HSPN, Hsp103, Hsp89, Hsp90, LAP-2, LAP2	heat shock protein 90 alpha family class A member 1
79001	VKORC1	EDTP308, MST134, MST576, VKCFD2, VKOR	vitamin K epoxide reductase complex subunit 1
2902	GRIN1	DEE101, GluN1, MRD8, NDHMSD, NDHMSR, NMD-R1, NMDA1, NMDAR1, NR1	glutamate ionotropic receptor NMDA type subunit 1
2157	F8	AHF, DXS1253EB, F8C, FVIII, HEMA, THPH13, F8	coagulation factor VIII
57761	TRIB3	C20orf97, NIPK, SINK, SKIP3, TRB3	tribbles pseudokinase 3
51738	GHRL	MTLRP	ghrelin and obestatin prepropeptide
1277	COL1A1	CAFYD, EDSARTH1, EDSC, OI1, OI2, OI3, OI4	collagen type I alpha 1 chain
841	CASP8	ALPS2B, CAP4, Casp-8, FLICE, MACH, MCH5	caspase 8
4843	NOS2	HEP-NOS, INOS, NOSA, NOS2	nitric oxide synthase 2
5624	PROC	APC, PC1, THPH3, THPH4, PROC	protein C, inactivator of coagulation factors Va and VIIIa
1557	CYP2C19	CPCJ, CYP2C, CYPIIC17, CYPIIC19, P450C2C, P450IIC19	cytochrome P450 family 2 subfamily C member 19
6696	SPP1	BNSP, BSPI, ETA-1, OPN	secreted phosphoprotein 1
847	CAT		catalase
55294	FBXW7	AGO, CDC4, DEDHIL, FBW6, FBW7, FBX30, FBXO30, FBXW6, SEL-10, SEL10, hAgo, hCdc4	F-box and WD repeat domain containing 7
267	AMFR	GP78, RNF45	autocrine motility factor receptor
1869	E2F1	E2F-1, RBAP1, RBBP3, RBP3	E2F transcription factor 1
27113	BBC3	JFY-1, JFY1, PUMA	BCL2 binding component 3
407040	MIR34A	MIRN34A, miRNA34A, mir-34, mir-34a	microRNA 34a
7917	BAG6	BAG-6, BAT3, D6S52E, G3	BAG cochaperone 6
3297	HSF1	HSTF1	heat shock transcription factor 1
8743	TNFSF10	APO2L, Apo-2L, CD253, TL2, TNLG6A, TRAIL	TNF superfamily member 10
2539	G6PD	G6PD1	glucose-6-phosphate dehydrogenase
1981	EIF4G1	EIF-4G1, EIF4F, EIF4G, EIF4GI, P220, PARK18	eukaryotic translation initiation factor 4 gamma 1
19	ABCA1	ABC-1, ABC1, CERP, HDLCQTL13, HDLDT1, HPALP1, TGD	ATP binding cassette subfamily A member 1
92140	MTDH	3D3, AEG-1, AEG1, LYRIC, LYRIC/3D3	metadherin
5479	PPIB	CYP-S1, CYPB, HEL-S-39, OI9, SCYLP	peptidylprolyl isomerase B
7076	TIMP1	CLGI, EPA, EPO, HCI, TIMP, TIMP-1	TIMP metallopeptidase inhibitor 1
51284	TLR7	IMD74, SLEB17-like, TLR7	toll like receptor 7
871	SERPINH1	AsTP3, CBP1, CBP2, HSP47, OI10, PIG14, PPROM, RA-A47, SERPINH2, gp46	serpin family H member 1
4233	MET	AUTS9, DA11, DFNB97, HGFR, RCCP2, c-Met	MET proto-oncogene, receptor tyrosine kinase
7097	TLR2	CD282, TIL4	toll like receptor 2
252995	FNDC5	FRCP2, irisin	fibronectin type III domain containing 5
90993	CREB3L1	OASIS, OI16	cAMP responsive element binding protein 3 like 1
10488	CREB3	LUMAN, LZIP, sLZIP	cAMP responsive element binding protein 3
8729	GBF1	ARF1GEF, CMT2GG	golgi brefeldin A resistant guanine nucleotide exchange factor 1
1116	CHI3L1	ASRT7, CGP-39, GP-39, GP39, HC-gp39, HCGP-3P, YK-40, YKL-40, YKL40, YYL-40, hCGP-39	chitinase 3 like 1
5329	PLAUR	CD87, U-PAR, UPAR, URKR	plasminogen activator, urokinase receptor
90865	IL33	C9orf26, DVS27, IL1F11, NF-HEV, NFEHEV	interleukin 33
3690	ITGB3	BDPLT16, BDPLT2, BDPLT24, CD61, GP3A, GPIIIa, GT, GT2	integrin subunit beta 3
5027	P2RX7	P2X7	purinergic receptor P2X 7
2852	GPER1	CEPR, CMKRL2, DRY12, FEG-1, GPCR-Br, GPER, GPR30, LERGU, LERGU2, LyGPR, mER	G protein-coupled estrogen receptor 1
9131	AIFM1	AIF, AUNX1, CMT2D, CMTX4, COWCK, COXPD6, DFNX5, NADMR, NAMSD, PDCD8, SEMDHL	apoptosis inducing factor mitochondria associated 1
7054	TH	DYT14, DYT5b, TYH	tyrosine hydroxylase
9518	GDF15	GDF-15, MIC-1, MIC1, NAG-1, PDF, PLAB, PTGFB	growth differentiation factor 15
55014	STX17		syntaxin 17
6780	STAU1	PPP1R150, STAU	staufen double-stranded RNA binding protein 1
23621	BACE1	ASP2, BACE, HSPC104	beta-secretase 1
983	CDK1	CDC2, CDC28A, P34CDC2	cyclin dependent kinase 1
3077	HFE	HFE1, HH, HLA-H, MVCD7, TFQTL2	homeostatic iron regulator
3308	HSPA4	APG-2, HEL-S-5a, HS24/P52, HSPH2, RY, hsp70, hsp70RY	heat shock protein family A (Hsp70) member 4
196	AHR	RP85, bHLHe76	aryl hydrocarbon receptor
240	ALOX5	5-LO, 5-LOX, 5LPG, LOG5	arachidonate 5-lipoxygenase
5604	MAP2K1	CFC3, MAPKK1, MEK1, MEL, MKK1, PRKMK1	mitogen-activated protein kinase kinase 1
51548	SIRT6	SIR2L6, hSIRT6	sirtuin 6
3135	HLA-G	MHC-G	major histocompatibility complex, class I, G
6331	SCN5A	CDCD2, CMD1E, CMPD2, HB1, HB2, HBBD, HH1, ICCD, IVF, LQT3, Nav1.5, PFHB1, SSS1, VF1	sodium voltage-gated channel alpha subunit 5
3784	KCNQ1	ATFB1, ATFB3, JLNS1, KCNA8, KCNA9, KVLQT1, Kv1.9, Kv7.1, LQT, LQT1, RWS, SQT2, WRS	potassium voltage-gated channel subfamily Q member 1
5347	PLK1	PLK, STPK13	polo like kinase 1
2243	FGA	Fib2	fibrinogen alpha chain
7248	TSC1	LAM, TSC	TSC complex subunit 1
26291	FGF21		fibroblast growth factor 21
7369	UMOD	ADMCKD2, ADTKD1, FJHN, HNFJ, HNFJ1, MCKD2, THGP, THP	uromodulin
1545	CYP1B1	ASGD6, CP1B, CYPIB1, GLC3A, P4501B1	cytochrome P450 family 1 subfamily B member 1
1718	DHCR24	DCE, Nbla03646, SELADIN1, seladin-1	24-dehydrocholesterol reductase
6683	SPAST	ADPSP, FSP2, SPG4	spastin
4925	NUCB2	HEL-S-109, NEFA	nucleobindin 2
5315	PKM	CTHBP, HEL-S-30, OIP3, PK32, TCB, THBP1, p58, PKM	pyruvate kinase M1/2
5979	RET	CDHF12, CDHR16, HSCR1, MEN2A, MEN2B, MTC1, PTC-ELE1, RET	ret proto-oncogene
1268	CNR1	CANN6, CB-R, CB1, CB1A, CB1K5, CB1R, CNR	cannabinoid receptor 1
5465	PPARA	NR1C1, PPAR, PPAR-alpha, PPARalpha, hPPAR	peroxisome proliferator activated receptor alpha
6720	SREBF1	HMD, IFAP2, SREBP1, bHLHd1	sterol regulatory element binding transcription factor 1
3156	HMGCR	LDLCQ3	3-hydroxy-3-methylglutaryl-CoA reductase
6548	SLC9A1	APNH, LIKNS, NHE-1, NHE1, PPP1R143	solute carrier family 9 member A1
6262	RYR2	ARVC2, ARVD2, RYR-2, RyR, VACRDS, VTSIP	ryanodine receptor 2
2261	FGFR3	ACH, CD333, CEK2, HSFGFR3EX, JTK4	fibroblast growth factor receptor 3
9365	KL	HFTC3A, KL	klotho
7442	TRPV1	VR1	transient receptor potential cation channel subfamily V member 1
3757	KCNH2	ERG-1, ERG1, H-ERG, HERG, HERG1, Kv11.1, LQT2, SQT1	potassium voltage-gated channel subfamily H member 2
2521	FUS	ALS6, ETM41, HNRNPP2, POMP75, TLS, altFUS, FUS	FUS RNA binding protein
3651	PDX1	GSF, IDX-1, IPF1, IUF1, MODY4, PAGEN1, PDX-1, STF-1	pancreatic and duodenal homeobox 1
4547	MTTP	ABL, MTP	microsomal triglyceride transfer protein
7873	MANF	ARMET, ARP	mesencephalic astrocyte derived neurotrophic factor
3312	HSPA8	HEL-33, HEL-S-72p, HSC54, HSC70, HSC71, HSP71, HSP73, HSPA10, LAP-1, LAP1, NIP71	heat shock protein family A (Hsp70) member 8
1234	CCR5	CC-CKR-5, CCCKR5, CCR-5, CD195, CKR-5, CKR5, CMKBR5, IDDM22	C-C motif chemokine receptor 5
5300	PIN1	DOD, UBL5	peptidylprolyl cis/trans isomerase, NIMA-interacting 1
9429	ABCG2	ABC15, ABCP, BCRP, BCRP1, BMDP, CD338, CDw338, CDw388, EST157481, GOUT1, MRX, MXR, MXR-1, MXR1, UAQTL1	ATP binding cassette subfamily G member 2 (Junior blood group)
356	FASLG	ALPS1B, APT1LG1, APTL, CD178, CD95-L, CD95L, FASL, TNFSF6, TNLG1A	Fas ligand
10959	TMED2	P24A, RNP24, p24, p24b1, p24beta1	transmembrane p24 trafficking protein 2
2896	GRN	CLN11, GEP, GP88, PCDGF, PEPI, PGRN	granulin precursor
7276	TTR	ATTR, CTS, CTS1, HEL111, HsT2651, PALB, TBPA, TTN	transthyretin
283120	H19	ASM, ASM1, BWS, D11S813E, LINC00008, MIR675HG, NCRNA00008, WT2	H19 imprinted maternally expressed transcript
6794	STK11	LKB1, PJS, hLKB1	serine/threonine kinase 11
6311	ATXN2	ATX2, SCA2, TNRC13	ataxin 2
682	BSG	5F7, CD147, EMMPRIN, EMPRIN, HAb18G, OK, TCSF	basigin (Ok blood group)
2247	FGF2	BFGF, FGF-2, FGFB, HBGF-2	fibroblast growth factor 2
5563	PRKAA2	AMPK, AMPK2, AMPKa2, PRKAA	protein kinase AMP-activated catalytic subunit alpha 2
6653	SORL1	C11orf32, LR11, LRP9, SORLA, SorLA-1, gp250	sortilin related receptor 1
57817	HAMP	HEPC, HFE2B, LEAP1, PLTR	hepcidin antimicrobial peptide
9927	MFN2	CMT2A, CMT2A2, CMT2A2A, CMT2A2B, CPRP1, HMSN6A, HSG, MARF	mitofusin 2
7249	TSC2	LAM, PPP1R160, TSC4	TSC complex subunit 2
3949	LDLR	FH, FHC, FHCL1, LDLCQ2	low density lipoprotein receptor
378938	MALAT1	HCN, LINC00047, NCRNA00047, NEAT2, PRO2853	metastasis associated lung adenocarcinoma transcript 1
4306	NR3C2	MCR, MLR, MRVIT, NR3C2	nuclear receptor subfamily 3 group C member 2
10013	HDAC6	CPBHM, HD6, JM21, PPP1R90	histone deacetylase 6
551	AVP	ADH, ARVP-NPII, AVRP, VP, AVP	arginine vasopressin
6319	SCD	FADS5, MSTP0081, SCDOS, hSCD1, SCD	stearoyl-CoA desaturase
24	ABCA4	ABC10, ABCR, ARMD2, CORD3, FFM, RMP, RP19, STGD, STGD1	ATP binding cassette subfamily A member 4
6446	SGK1	SGK	serum/glucocorticoid regulated kinase 1
8542	APOL1	APO-L, APOL, APOL-I, FSGS4	apolipoprotein L1
2034	EPAS1	ECYT4, HIF2A, HLF, MOP2, PASD2, bHLHe73	endothelial PAS domain protein 1
29979	UBQLN1	DA41, DSK2, PLIC-1, UBQN, XDRP1	ubiquilin 1
83667	SESN2	HI95, SES2, SEST2	sestrin 2
64764	CREB3L2	BBF2H7	cAMP responsive element binding protein 3 like 2
1457	CSNK2A1	CK2A1, CKII, Cka1, Cka2, OCNDS	casein kinase 2 alpha 1
3265	HRAS	C-BAS/HAS, C-H-RAS, C-HA-RAS1, CTLO, H-RASIDX, HAMSV1, RASH1, p21ras, HRAS	HRas proto-oncogene, GTPase
4323	MMP14	MMP-14, MMP-X1, MT-MMP, MT-MMP 1, MT1-MMP, MT1MMP, MTMMP1, WNCHRS	matrix metallopeptidase 14
6868	ADAM17	ADAM18, CD156B, CSVP, NISBD, NISBD1, TACE	ADAM metallopeptidase domain 17
6790	AURKA	AIK, ARK1, AURA, BTAK, PPP1R47, STK15, STK6, STK7	aurora kinase A
3815	KIT	C-Kit, CD117, MASTC, PBT, SCFR	KIT proto-oncogene, receptor tyrosine kinase
10313	RTN3	ASYIP, HAP, NSPL2, NSPLII-A1, RTN3	reticulon 3
3678	ITGA5	CD49e, FNRA, VLA-5, VLA5A	integrin subunit alpha 5
3486	IGFBP3	BP-53, IBP3	insulin like growth factor binding protein 3
3375	IAPP	DAP, IAP	islet amyloid polypeptide
8408	ULK1	ATG1, ATG1A, UNC51, Unc51.1, hATG1	unc-51 like autophagy activating kinase 1
7098	TLR3	CD283, IIAE2, IMD83	toll like receptor 3
2534	FYN	SLK, SYN, p59-FYN	FYN proto-oncogene, Src family tyrosine kinase
4854	NOTCH3	CADASIL, CADASIL1, CASIL, IMF2, LMNS	notch receptor 3
2017	CTTN	EMS1	cortactin
3481	IGF2	C11orf43, GRDF, IGF-II, PP9974, SRS3	insulin like growth factor 2
4779	NFE2L1	LCR-F1, NRF-1, NRF1, TCF11	NFE2 like bZIP transcription factor 1
5320	PLA2G2A	MOM1, PLA2, PLA2B, PLA2L, PLA2S, PLAS1, sPLA2	phospholipase A2 group IIA
3638	INSIG1	CL6	insulin induced gene 1
51360	MBTPS2	BRESEK, IFAP, KFSD, KFSDX, OI19, OLMSX, S2P	membrane bound transcription factor peptidase, site 2
80149	ZC3H12A	MCPIP, MCPIP-1, MCPIP1, Reg1, dJ423B22.1	zinc finger CCCH-type containing 12A
5321	PLA2G4A	GURDP, PLA2G4, cPLA2, cPLA2-alpha	phospholipase A2 group IVA
102	ADAM10	AD10, AD18, CD156c, CDw156, HsT18717, MADM, RAK, kuz	ADAM metallopeptidase domain 10
824	CAPN2	CANP2, CANPL2, CANPml, mCANP	calpain 2
10628	TXNIP	ARRDC6, EST01027, HHCPA78, THIF, VDUP1	thioredoxin interacting protein
4363	ABCC1	ABC29, ABCC, DFNA77, GS-X, MRP, MRP1	ATP binding cassette subfamily C member 1
1544	CYP1A2	CP12, CYPIA2, P3-450, P450(PA)	cytochrome P450 family 1 subfamily A member 2
3558	IL2	IL-2, TCGF, lymphokine	interleukin 2
4586	MUC5AC	MUC5, TBM, leB, mucin	mucin 5AC, oligomeric mucus/gel-forming
54901	CDKAL1		CDK5 regulatory subunit associated protein 1 like 1
5451	POU2F1	OCT1, OTF1, Oct1Z, oct-1B	POU class 2 homeobox 1
4893	NRAS	ALPS4, CMNS, KRAS, N-ras, NCMS1, NS6, NRAS	NRAS proto-oncogene, GTPase
1280	COL2A1	ANFH, AOM, COL11A3, SEDC, STL1	collagen type II alpha 1 chain
22872	SEC31A	ABP125, ABP130, HPBKS, HSPC275, HSPC334, NEDSOSB, SEC31L1	SEC31 homolog A, COPII coat complex component
9021	SOCS3	ATOD4, CIS3, Cish3, SOCS-3, SSI-3, SSI3	suppressor of cytokine signaling 3
5176	SERPINF1	EPC-1, OI12, OI6, PEDF, PIG35	serpin family F member 1
3329	HSPD1	CPN60, GROEL, HLD4, HSP-60, HSP60, HSP65, HuCHA60, SPG13	heat shock protein family D (Hsp60) member 1
238	ALK	ALK1, CD246, NBLST3	ALK receptor tyrosine kinase
23657	SLC7A11	CCBR1, xCT	solute carrier family 7 member 11
440275	EIF2AK4	GCN2, PVOD2	eukaryotic translation initiation factor 2 alpha kinase 4
6646	SOAT1	ACACT, ACAT, ACAT-1, ACAT1, SOAT, STAT	sterol O-acyltransferase 1
2200	FBN1	ACMICD, ECTOL1, FBN, GPHYSD2, MASS, MFLS, MFS1, OCTD, SGS, SSKS, WMS, WMS2	fibrillin 1
22943	DKK1	DKK-1, SK	dickkopf WNT signaling pathway inhibitor 1
285	ANGPT2	AGPT2, ANG2, LMPHM10	angiopoietin 2
3172	HNF4A	FRTS4, HNF4, HNF4a7, HNF4a8, HNF4a9, HNF4alpha, MODY, MODY1, NR2A1, NR2A21, TCF, TCF-14, TCF14	hepatocyte nuclear factor 4 alpha
406985	MIR200C	MIRN200C, mir-200c	microRNA 200c
3117	HLA-DQA1	CELIAC1, DQ-A1, DQA1, HLA-DQA*, HLA-DQB1, HLA-DQA1	major histocompatibility complex, class II, DQ alpha 1
1589	CYP21A2	CA21H, CAH1, CPS1, CYP21, CYP21B, P450c21B	cytochrome P450 family 21 subfamily A member 2
10952	SEC61B		SEC61 translocon subunit beta
58515	SELENOK	HSPC030, HSPC297, SELK	selenoprotein K
24145	PANX1	MRS1, OOMD7, PX1, UNQ2529	pannexin 1
3240	HP	BP2ALPHA2, HPA1S, HP	haptoglobin
5366	PMAIP1	APR, NOXA	phorbol-12-myristate-13-acetate-induced protein 1
3371	TNC	150-225, DFNA56, GMEM, GP, HXB, JI, TN, TN-C	tenascin C
6400	SEL1L	Hrd3, PRO1063, SEL1-LIKE1, SEL1L	SEL1L adaptor subunit of ERAD E3 ubiquitin ligase
8614	STC2	STC-2, STCRP	stanniocalcin 2
706	TSPO	BPBS, BZRP, DBI, IBP, MBR, PBR, PBS, PKBS, PTBR1, mDRC, pk18, TSPO	translocator protein
5581	PRKCE	PKCE, nPKC-epsilon	protein kinase C epsilon
1958	EGR1	AT225, G0S30, KROX-24, NGFI-A, TIS8, ZIF-268, ZNF225	early growth response 1
2688	GH1	GH, GH-N, GHB5, GHN, IGHD1A, IGHD1B, IGHD2, hGH-N	growth hormone 1
3593	IL12B	CLMF, CLMF2, IL-12B, IMD28, IMD29, NKSF, NKSF2	interleukin 12B
7035	TFPI	EPI, LACI, TFI1, TFPI	tissue factor pathway inhibitor
1394	CRHR1	CRF-R, CRF-R-1, CRF-R1, CRF1, CRFR-1, CRFR1, CRH-R-1, CRH-R1, CRHRL, CRHR1	corticotropin releasing hormone receptor 1
10664	CTCF	CFAP108, FAP108, MRD21	CCCTC-binding factor
65992	DDRGK1	C20orf116, SEMDSH, UFBP1, dJ1187M17.3	DDRGK domain containing 1
632	BGLAP	BGP, OC, OCN	bone gamma-carboxyglutamate protein
54463	RETREG1	FAM134B, JK-1, JK1	reticulophagy regulator 1
174	AFP	AFPD, FETA, HPAFP	alpha fetoprotein
1201	CLN3	BTN1, BTS, JNCL	CLN3 lysosomal/endosomal transmembrane protein, battenin
7474	WNT5A	hWNT5A	Wnt family member 5A
7345	UCHL1	HEL-117, HEL-S-53, NDGOA, PARK5, PGP 9.5, PGP9.5, PGP95, SPG79, UCHL-1, Uch-L1	ubiquitin C-terminal hydrolase L1
652	BMP4	BMP2B, BMP2B1, MCOPS6, OFC11, ZYME	bone morphogenetic protein 4
10399	RACK1	GNB2L1, Gnb2-rs1, H12.3, HLC-7, PIG21	receptor for activated C kinase 1
3956	LGALS1	GAL1, GBP	galectin 1
6441	SFTPD	COLEC7, PSP-D, SFTP4, SP-D	surfactant protein D
5742	PTGS1	COX1, COX3, PCOX1, PES-1, PGG/HS, PGHS-1, PGHS1, PHS1, PTGHS	prostaglandin-endoperoxide synthase 1
7132	TNFRSF1A	CD120a, FPF, TBP1, TNF-R, TNF-R-I, TNF-R55, TNFAR, TNFR1, TNFR55, TNFR60, p55, p55-R, p60	TNF receptor superfamily member 1A
5350	PLN	CMD1P, CMH18, PLB	phospholamban
4976	OPA1	BERHS, MGM1, MTDPS14, NPG, NTG, largeG	OPA1 mitochondrial dynamin like GTPase
3290	HSD11B1	11-DH, 11-beta-HSD1, CORTRD2, HDL, HSD11, HSD11B, HSD11L, SDR26C1	hydroxysteroid 11-beta dehydrogenase 1
22914	KLRK1	CD314, D12S2489E, KLR, NKG2-D, NKG2D	killer cell lectin like receptor K1
10062	NR1H3	LXR-a, LXRA, RLD-1	nuclear receptor subfamily 1 group H member 3
567	B2M	IMD43	beta-2-microglobulin
3627	CXCL10	C7, IFI10, INP10, IP-10, SCYB10, crg-2, gIP-10, mob-1	C-X-C motif chemokine ligand 10
29927	SEC61A1	ADTKD5, HNFJ4, HSEC61, SEC61, SEC61A	SEC61 translocon subunit alpha 1
55161	TMEM33	1600019D15Rik, Pom33, SHINC-3, SHINC3	transmembrane protein 33
1548	CYP2A6	CPA6, CYP2A, CYP2A3, CYPIIA6, P450C2A, P450PB	cytochrome P450 family 2 subfamily A member 6
820	CAMP	CAP-18, CAP18, CRAMP, FALL-39, FALL39, HSD26, LL37	cathelicidin antimicrobial peptide
1739	DLG1	DLGH1, SAP-97, SAP97, hdlg	discs large MAGUK scaffold protein 1
2010	EMD	EDMD, LEMD5, STA	emerin
54209	TREM2	PLOSL2, TREM-2, Trem2a, Trem2b, Trem2c	triggering receptor expressed on myeloid cells 2
846	CASR	CAR, EIG8, FHH, FIH, GPRC2A, HHC, HHC1, HYPOC1, NSHPT, PCAR1, hCasR	calcium sensing receptor
3313	HSPA9	CRP40, CSA, EVPLS, GRP-75, GRP75, HEL-S-124mB, MOT, MOT2, MTHSP75, PBP74, SAAN, SIDBA4, HSPA9	heat shock protein family A (Hsp70) member 9
84876	ORAI1	CRACM1, IMD9, ORAT1, TAM2, TMEM142A	ORAI calcium release-activated calcium modulator 1
6261	RYR1	CCO, KDS, MHS, MHS1, PPP1R137, RYDR, RYR, RYR-1, SKRR	ryanodine receptor 1
3643	INSR	CD220, HHF5	insulin receptor
1555	CYP2B6	CPB6, CYP2B, CYP2B7, CYP2B7P, CYPIIB6, EFVM, IIB1, P450	cytochrome P450 family 2 subfamily B member 6
4023	LPL	HDLCQ11, LIPD	lipoprotein lipase
8989	TRPA1	ANKTM1, FEPS, FEPS1, p120	transient receptor potential cation channel subfamily A member 1
153	ADRB1	ADRB1R, B1AR, BETA1AR, FNSS2, RHR	adrenoceptor beta 1
3600	IL15	IL-15	interleukin 15
5045	FURIN	FUR, PACE, PCSK3, SPC1	furin, paired basic amino acid cleaving enzyme
966	CD59	16.3A5, 1F5, EJ16, EJ30, EL32, G344, HRF-20, HRF20, MAC-IP, MACIF, MEM43, MIC11, MIN1, MIN2, MIN3, MIRL, MSK21, p18-20	CD59 molecule (CD59 blood group)
10890	RAB10		RAB10, member RAS oncogene family
10549	PRDX4	AOE37-2, AOE372, HEL-S-97n, PRX-4	peroxiredoxin 4
653509	SFTPA1	COLEC4, ILD1, PSAP, PSP-A, PSPA, SFTP1B, SP-A, SP-A1, SP-A1 beta, SP-A1 delta, SP-A1 epsilon, SP-A1 gamma, SPA, SPA1, SFTPA1	surfactant protein A1
1269	CNR2	CB-2, CB2, CX5	cannabinoid receptor 2
4102	MAGEA3	CT1.3, HIP8, HYPD, MAGE3, MAGEA6	MAGE family member A3
5445	PON2		paraoxonase 2
27161	AGO2	CASC7, EIF2C2, LESKRES, LINC00980, PPD, Q10	argonaute RISC catalytic component 2
2641	GCG	GLP-1, GLP1, GLP2, GRPP	glucagon
4287	ATXN3	AT3, ATX3, JOS, MJD, MJD1, SCA3	ataxin 3
27185	DISC1	C1orf136, SCZD9	DISC1 scaffold protein
408	ARRB1	ARB1, ARR1	arrestin beta 1
3304	HSPA1B	HSP70-1, HSP70-1B, HSP70-2, HSP70.1, HSP70.2, HSP72, HSPA1, HSX70	heat shock protein family A (Hsp70) member 1B
197	AHSG	A2HS, AHS, APMR1, FETUA, HSGA	alpha 2-HS glycoprotein
5605	MAP2K2	CFC4, MAPKK2, MEK2, MKK2, PRKMK2	mitogen-activated protein kinase kinase 2
1621	DBH	DBM, ORTHYP1	dopamine beta-hydroxylase
664	BNIP3	HABON, NIP3	BCL2 interacting protein 3
3351	HTR1B	5-HT-1B, 5-HT-1D-beta, 5-HT1B, 5-HT1DB, HTR1D2, HTR1DB, S12	5-hydroxytryptamine receptor 1B
3484	IGFBP1	AFBP, IBP1, IGF-BP25, PP12, hIGFBP-1	insulin like growth factor binding protein 1
775	CACNA1C	CACH2, CACN2, CACNL1A1, CCHL1A1, CaV1.2, LQT8, NEDHLSS, TS, TS. LQT8	calcium voltage-gated channel subunit alpha1 C
246	ALOX15	12-LOX, 15-LOX, 15-LOX-1, LOG15	arachidonate 15-lipoxygenase
5861	RAB1A	RAB1, YPT1	RAB1A, member RAS oncogene family
949	SCARB1	CD36L1, CLA-1, CLA1, HDLQTL6, SR-BI, SRB1	scavenger receptor class B member 1
3837	KPNB1	IMB1, IPO1, IPOB, Impnb, NTF97	karyopherin subunit beta 1
590	BCHE	BCHED, CHE1, CHE2, E1	butyrylcholinesterase
4087	SMAD2	CHTD8, JV18, JV18-1, LDS6, MADH2, MADR2, hMAD-2, hSMAD2	SMAD family member 2
7471	WNT1	BMND16, INT1, OI15	Wnt family member 1
7018	TF	HEL-S-71p, PRO1557, PRO2086QTL1, TF	transferrin
2052	EPHX1	EPHX, EPOX, HYL1, MEH	epoxide hydrolase 1
2264	FGFR4	CD334, JTK2, TKF	fibroblast growth factor receptor 4
8398	PLA2G6	CaI-PLA2, GVI, INAD1, IPLA2-VIA, NBIA2, NBIA2A, NBIA2B, PARK14, PLA2, PNPLA9, iPLA2, iPLA2beta	phospholipase A2 group VI
51561	IL23A	IL-23, IL-23A, IL23P19, P19, SGRF	interleukin 23 subunit alpha
4221	MEN1	MEAI, SCG2	menin 1
374	AREG	ARB, CRDGF, SDGF, AREG	amphiregulin
4763	NF1	NFNS, VRNF, WSS	neurofibromin 1
23586	RIGI	DDX58, RIG-I, RIG1, RLR-1, SGMRT2	RNA sensor RIG-I
6521	SLC4A1	AE1, BND3, CD233, CHC, DI, EMPB3, EPB3, FR, RTA1A, SAO, SPH4, SW, WD, WD1, WR	solute carrier family 4 member 1 (Diego blood group)
5894	RAF1	CMD1NN, CRAF, NS5, Raf-1, c-Raf	Raf-1 proto-oncogene, serine/threonine kinase
10087	CERT1	CERT, CERTL, COL4A3BP, GPBP, MRD34, STARD11	ceramide transporter 1
10550	ARL6IP5	DERP11, GTRAP3-18, HSPC127, JWA, PRAF3, Yip6b, addicsin, hp22, jmx	ADP ribosylation factor like GTPase 6 interacting protein 5
406976	MIR199A1	MIR-199-s, MIRN199A1, mir-199a-1	microRNA 199a-1
801	CALM1	CALML2, CAM2, CAM3, CAMB, CAMC, CAMI, CAMIII, CPVT4, DD132, LQT14, PHKD, PHKD1, caM	calmodulin 1
3592	IL12A	CLMF, IL-12A, NFSK, NKSF1, P35	interleukin 12A
2542	SLC37A4	CDG2W, G6PT, G6PT1, G6PT2, G6PT3, GSD1b, GSD1c, GSD1d, PRO0685, SPX4, TRG-19, TRG19	solute carrier family 37 member 4
3667	IRS1	HIRS-1	insulin receptor substrate 1
6678	SPARC	BM-40, OI17, ON, ONT	secreted protein acidic and cysteine rich
5566	PRKACA	CAFD1, PKACA, PPNAD4	protein kinase cAMP-activated catalytic subunit alpha
5740	PTGIS	CYP8, CYP8A1, PGIS, PTGI	prostaglandin I2 synthase
1139	CHRNA7	CHRNA7-2, NACHRA7	cholinergic receptor nicotinic alpha 7 subunit
117	ADCYAP1R1	PAC1, PAC1R, PACAPR, PACAPRI	ADCYAP receptor type I
10855	HPSE	HPA, HPA1, HPR11, HSE1, HPSE	heparanase
57190	SELENON	CFTD, MDRS1, RSMD1, RSS, SELN, SEPN1	selenoprotein N
138065	RNF183		ring finger protein 183
10857	PGRMC1	Dap1, HPR6.6, IZA, MPR	progesterone receptor membrane component 1
1727	CYB5R3	B5R, DIA1	cytochrome b5 reductase 3
1281	COL3A1	EDS4A, EDSVASC, PMGEDSV	collagen type III alpha 1 chain
55704	CCDC88A	APE, GIRDIN, GIV, GRDN, HkRP1, KIAA1212, PEHO, PEHOL	coiled-coil domain containing 88A
8452	CUL3	CUL-3, NEDAUS, PHA2E	cullin 3
8639	AOC3	HPAO, SSAO, VAP-1, VAP1	amine oxidase copper containing 3
23175	LPIN1	PAP1	lipin 1
8737	RIPK1	AIEFL, IMD57, RIP, RIP-1, RIP1	receptor interacting serine/threonine kinase 1
2159	F10	FX, FXA	coagulation factor X
23376	UFL1	KIAA0776, Maxer, NLBP, RCAD	UFM1 specific ligase 1
60674	GAS5	NCRNA00030, SNHG2	growth arrest specific 5
1612	DAPK1	DAPK, ROCO3	death associated protein kinase 1
2078	ERG	erg-3, p55	ETS transcription factor ERG
26471	NUPR1	COM1, P8	nuclear protein 1, transcriptional regulator
3164	NR4A1	GFRP1, HMR, N10, NAK-1, NGFIB, NP10, NUR77, TR3	nuclear receptor subfamily 4 group A member 1
6198	RPS6KB1	PS6K, S6K, S6K-beta-1, S6K1, STK14A, p70 S6KA, p70(S6K)-alpha, p70-S6K, p70-alpha	ribosomal protein S6 kinase B1
10456	HAX1	HCLSBP1, HS1BP1, SCN3	HCLS1 associated protein X-1
6418	SET	2PP2A, I2PP2A, IGAAD, IPP2A2, MRD58, PHAPII, TAF-I, TAF-IBETA	SET nuclear proto-oncogene
57521	RPTOR	KOG1, Mip1	regulatory associated protein of MTOR complex 1
7095	SEC62	Dtrp1, HTP1, TLOC1, TP-1	SEC62 homolog, preprotein translocation factor
6505	SLC1A1	DCBXA, EAAC1, EAAT3, SCZD18, hEAAC1	solute carrier family 1 member 1
3178	HNRNPA1	ALS19, ALS20, HNRPA1, HNRPA1L3, IBMPFD3, UP 1, hnRNP A1, hnRNP-A1	heterogeneous nuclear ribonucleoprotein A1
407018	MIR27A	MIR27, MIRN27A, mir-27a	microRNA 27a
3358	HTR2C	5-HT1C, 5-HT2C, 5-HTR2C, 5HTR2C, HTR1C	5-hydroxytryptamine receptor 2C
445	ASS1	ASS, CTLN1	argininosuccinate synthase 1
3276	PRMT1	ANM1, HCP1, HRMT1L2, IR1B4	protein arginine methyltransferase 1
6197	RPS6KA3	CLS, HU-3, ISPK-1, MAPKAPK1B, MRX19, RSK, RSK2, S6K-alpha3, XLID19, p90-RSK2, pp90RSK2	ribosomal protein S6 kinase A3
7942	TFEB	ALPHATFEB, BHLHE35, TCFEB	transcription factor EB
8720	MBTPS1	PCSK8, S1P, SEDKF, SKI-1	membrane bound transcription factor peptidase, site 1
3060	HCRT	NRCLP1, OX, PPOX	hypocretin neuropeptide precursor
462	SERPINC1	AT3, AT3D, ATIII, ATIII-R2, ATIII-T1, ATIII-T2, THPH7	serpin family C member 1
26580	BSCL2	GNG3LG, HMN5, HMN5C, PELD, SPG17	BSCL2 lipid droplet biogenesis associated, seipin
1020	CDK5	LIS7, PSSALRE	cyclin dependent kinase 5
1356	CP	AB073614-2, CP	ceruloplasmin
6716	SRD5A2		steroid 5 alpha-reductase 2
4253	MIA2	CTAGE5, MEA6, MGEA, MGEA11, MGEA6, TALI	MIA SH3 domain ER export factor 2
4160	MC4R	BMIQ20	melanocortin 4 receptor
79400	NOX5		NADPH oxidase 5
8837	CFLAR	CASH, CASP8AP1, CLARP, Casper, FLAME, FLAME-1, FLAME1, FLIP, I-FLICE, MRIT, c-FLIP, c-FLIPL, c-FLIPR, c-FLIPS, cFLIP	CASP8 and FADD like apoptosis regulator
85480	TSLP		thymic stromal lymphopoietin
2213	FCGR2B	CD32, CD32B, FCG2, FCGR2, FCGR2C, FcGRIIB, FcRII-c, FcgammaRIIb, IGFR2	Fc gamma receptor IIb
2719	GPC3	DGSX, GTR2-2, MXR7, OCI-5, SDYS, SGB, SGBS, SGBS1	glypican 3
57620	STIM2		stromal interaction molecule 2
84699	CREB3L3	CREB-H, CREBH, HYST1481, HYTG2	cAMP responsive element binding protein 3 like 3
3674	ITGA2B	BDPLT16, BDPLT2, CD41, CD41B, GP2B, GPIIb, GT, GT1, GTA, HPA3, PPP1R93	integrin subunit alpha 2b
4017	LOXL2	LOR, LOR2, WS9-14	lysyl oxidase like 2
89780	WNT3A		Wnt family member 3A
1558	CYP2C8	CPC8DM, CYPIIC8, MP-12/MP-20, CYP2C8	cytochrome P450 family 2 subfamily C member 8
54578	UGT1A6	GNT1, HLUGP, HLUGP1, UDPGT, UDPGT 1-6, UGT-1A, UGT-1C, UGT-1E, UGT-1F, UGT1, UGT1-01, UGT1-03, UGT1-05, UGT1-06, UGT1.1, UGT1.3, UGT1.5, UGT1.6, UGT1A, UGT1A1, UGT1A3, UGT1A5S, UGT1C, UGT1E, UGT1F, hUG-BR1, UGT1A6	UDP glucuronosyltransferase family 1 member A6
4599	MX1	IFI-78K, IFI78, MX, MxA, lncMX1-215	MX dynamin like GTPase 1
135	ADORA2A	A2aR, ADORA2, RDC8	adenosine A2a receptor
3491	CCN1	CYR61, GIG1, IGFBP10	cellular communication network factor 1
6252	RTN1	NSP	reticulon 1
3767	KCNJ11	BIR, HHF2, IKATP, KIR6.2, MODY13, PHHI, PNDM2, TNDM3	potassium inwardly rectifying channel subfamily J member 11
2746	GLUD1	GDH, GDH1, GLUD, hGDH1	glutamate dehydrogenase 1
317	APAF1	APAF-1, CED4	apoptotic peptidase activating factor 1
50506	DUOX2	LNOX2, NOXEF2, P138-TOX, TDH6, THOX2	dual oxidase 2
3838	KPNA2	IPOA1, PTAC58, QIP2, RCH1, SRP1-alpha, SRP1alpha	karyopherin subunit alpha 2
55384	MEG3	FP504, GTL2, LINC00023, NCRNA00023, PRO0518, PRO2160, onco-lncRNA-83, prebp1	maternally expressed 3
407006	MIR221	MIRN221, miRNA221, mir-221	microRNA 221
8289	ARID1A	B120, BAF250, BAF250a, BM029, C1orf4, CSS2, ELD, MRD14, OSA1, P270, SMARCF1, hELD, hOSA1	AT-rich interaction domain 1A
5627	PROS1	PROS, PS21, PS22, PS23, PS24, PS25, PSA, THPH5, THPH6	protein S
3778	KCNMA1	BKTM, CADEDS, IEG16, KCa1.1, LIWAS, MaxiK, PNKD3, SAKCA, SLO, SLO-ALPHA, SLO1, bA205K10.1, hSlo, mSLO1	potassium calcium-activated channel subfamily M alpha 1
8877	SPHK1	SPHK	sphingosine kinase 1
5730	PTGDS	L-PGDS, LPGDS, PDS, PGD2, PGDS, PGDS2	prostaglandin D2 synthase
2065	ERBB3	ErbB-3, FERLK, HER3, LCCS2, MDA-BF-1, VSCN1, c-erbB-3, c-erbB3, erbB3-S, p180-ErbB3, p45-sErbB3, p85-sErbB3	erb-b2 receptor tyrosine kinase 3
7060	THBS4	TSP-4, TSP4	thrombospondin 4
3932	LCK	IMD22, LSK, YT16, p56lck, pp58lck	LCK proto-oncogene, Src family tyrosine kinase
7444	VRK2		VRK serine/threonine kinase 2
2316	FLNA	ABP-280, ABPX, CSBS, CVD1, FGS2, FLN, FLN-A, FLN1, FMD, MNS, NHBP, OPD, OPD1, OPD2, XLVD, XMVD	filamin A
6440	SFTPC	BRICD6, PSP-C, SFTP2, SMDP2, SP-C, SP5	surfactant protein C
51290	ERGIC2	CDA14, Erv41, PTX1, cd002	ERGIC and golgi 2
842	CASP9	APAF-3, APAF3, ICE-LAP6, MCH6, PPP1R56	caspase 9
5447	POR	CPR, CYPOR, P450R	cytochrome p450 oxidoreductase
554	AVPR2	ADHR, DI1, DIR, DIR3, NDI, NDI1, V2R	arginine vasopressin receptor 2
1282	COL4A1	BSVD, BSVD1s, PADMAL, RATOR, COL4A1	collagen type IV alpha 1 chain
283	ANG	ALS9, HEL168, RAA1, RNASE4, RNASE5	angiogenin
3990	LIPC	HDLCQ12, HL, HTGL, LIPH	lipase C, hepatic type
26608	TBL2	WBSCR13, WS-betaTRP	transducin beta like 2
5296	PIK3R2	MPPH, MPPH1, P85B, p85, p85-BETA	phosphoinositide-3-kinase regulatory subunit 2
1508	CTSB	APPS, CPSB, RECEUP	cathepsin B
362	AQP5	AQP-5, PPKB	aquaporin 5
684	BST2	CD317, HM1.24, TETHERIN	bone marrow stromal cell antigen 2
57104	PNPLA2	1110001C14Rik, ATGL, FP17548, PEDF-R, TTS-2.2, TTS2, iPLA2zeta	patatin like phospholipase domain containing 2
10342	TFG	HMSNP, SPG57, TF6, TRKT3	trafficking from ER to golgi regulator
2670	GFAP	ALXDRD	glial fibrillary acidic protein
5172	SLC26A4	DFNB4, EVA, PDS, TDH2B	solute carrier family 26 member 4
1812	DRD1	DADRA, DRD1	dopamine receptor D1
9474	ATG5	APG5, APG5-LIKE, APG5L, ASP, SCAR25, hAPG5	autophagy related 5
613	BCR	ALL1, CML, D22S11, D22S662, PHL, BCR	BCR activator of RhoGEF and GTPase
6288	SAA1	PIG4, SAA, SAA2, TP53I4	serum amyloid A1
1901	S1PR1	CD363, CHEDG1, D1S3362, ECGF1, EDG-1, EDG1, S1P1	sphingosine-1-phosphate receptor 1
6188	RPS3	S3	ribosomal protein S3
329	BIRC2	API1, HIAP2, Hiap-2, MIHB, RNF48, c-IAP1, cIAP1	baculoviral IAP repeat containing 2
8945	BTRC	BETA-TRCP, FBW1A, FBXW1, FBXW1A, FWD1, bTrCP, bTrCP1, betaTrCP	beta-transducin repeat containing E3 ubiquitin protein ligase
6010	RHO	CSNBAD1, OPN2, RP4	rhodopsin
23209	MLC1	LVM, MLC, VL	modulator of VRAC current 1
710	SERPING1	C1IN, C1INH, C1NH, HAE1, HAE2	serpin family G member 1
81542	TMX1	PDIA11, TMX, TXNDC, TXNDC1	thioredoxin related transmembrane protein 1
2671	GFER	ALR, ERV1, HERV1, HPO, HPO1, HPO2, HSS, MMCHD, MPMCD	growth factor, augmenter of liver regeneration
662	BNIP1	NIP1, SEC20, TRG-8	BCL2 interacting protein 1
389	RHOC	ARH9, ARHC, H9, RHOH9	ras homolog family member C
3037	HAS2		hyaluronan synthase 2
79054	TRPM8	LTRPC6, LTrpC-6, TRPP8, trp-p8	transient receptor potential cation channel subfamily M member 8
9759	HDAC4	AHO3, BDMR, HA6116, HD4, HDAC-4, HDAC-A, HDACA, NEDCHF, NEDCHID	histone deacetylase 4
51311	TLR8	CD288, IMD98, hTLR8	toll like receptor 8
3439	IFNA1	IFL, IFN, IFN-ALPHA, IFN-alphaD3, IFNA@, leIF D, IFNA1	interferon alpha 1
51569	UFM1	BM-002, C13orf20, HLD14	ubiquitin fold modifier 1
4286	MITF	CMM8, COMMAD, MI-A, WS2, WS2A, bHLHe32, MITF	melanocyte inducing transcription factor
6125	RPL5	L5, MSTP030, PPP1R135, uL18	ribosomal protein L5
215	ABCD1	ABC42, ALD, ALDP, AMN	ATP binding cassette subfamily D member 1
666	BOK	BCL2L9L, BOK	BCL2 family apoptosis regulator BOK
6737	TRIM21	RNF81, RO52, Ro/SSA, SSA, SSA1	tripartite motif containing 21
2907	GRINA	HNRGW, LFG1, NMDARA1, TMBIM3	glutamate ionotropic receptor NMDA type subunit associated protein 1
7534	YWHAZ	14-3-3-zeta, HEL-S-3, HEL-S-93, HEL4, KCIP-1, POPCHAS, YWHAD	tyrosine 3-monooxygenase/tryptophan 5-monooxygenase activation protein zeta
4311	MME	CALLA, CD10, CMT2T, NEP, SCA43, SFE	membrane metalloendopeptidase
10483	SEC23B	CDA-II, CDAII, CDAN2, CWS7, HEMPAS, hSec23B	SEC23 homolog B, COPII coat complex component
4853	NOTCH2	AGS2, HJCYS, hN2	notch receptor 2
350	APOH	B2G1, B2GP1, BG	apolipoprotein H
5741	PTH	FIH11, PTH	parathyroid hormone
301	ANXA1	ANX1, LPC1	annexin A1
7225	TRPC6	FSGS2, TRP6	transient receptor potential cation channel subfamily C member 6
10524	KAT5	ESA1, HTATIP, HTATIP1, NEDFASB, PLIP, TIP, TIP60, ZC2HC5, cPLA2	lysine acetyltransferase 5
10644	IGF2BP2	IMP-2, IMP2, VICKZ2	insulin like growth factor 2 mRNA binding protein 2
2166	FAAH	FAAH-1, PSAB	fatty acid amide hydrolase
10558	SPTLC1	HSAN1, HSN1, LBC1, LCB1, SPT1, SPTI	serine palmitoyltransferase long chain base subunit 1
79727	LIN28A	CSDD1, LIN-28, LIN28, ZCCHC1, lin-28A	lin-28 homolog A
1509	CTSD	CLN10, CPSD, HEL-S-130P	cathepsin D
9568	GABBR2	DEE59, EIEE59, GABABR2, GPR51, GPRC3B, HG20, HRIHFB2099, NDPLHS	gamma-aminobutyric acid type B receptor subunit 2
4322	MMP13	CLG3, MANDP1, MDST, MMP-13	matrix metallopeptidase 13
859	CAV3	LGMD1C, LQT9, MPDT, RMD2, VIP-21, VIP21	caveolin 3
1634	DCN	CSCD, DSPG2, PG40, PGII, PGS2, SLRR1B	decorin
337	APOA4		apolipoprotein A4
29110	TBK1	FTDALS4, IIAE8, NAK, T2K	TANK binding kinase 1
5245	PHB1	HEL-215, HEL-S-54e, PHB	prohibitin 1
7376	NR1H2	LXR-b, LXRB, NER, NER-I, RIP15, UNR	nuclear receptor subfamily 1 group H member 2
3716	JAK1	AIIDEA, JAK1B, JTK3, JAK1	Janus kinase 1
653361	NCF1	CGD1A, NOXO2, SH3PXD1A, p47phox, NCF1	neutrophil cytosolic factor 1
409	ARRB2	ARB2, ARR2, BARR2	arrestin beta 2
6729	SRP54	SCN8	signal recognition particle 54
406942	MIR150	MIRN150, miRNA150, mir-150	microRNA 150
5335	PLCG1	NCKAP3, PLC-II, PLC1, PLC148, PLCgamma1	phospholipase C gamma 1
8797	TNFRSF10A	APO2, CD261, DR4, TRAILR-1, TRAILR1	TNF receptor superfamily member 10a
7922	SLC39A7	AGM9, D6S115E, D6S2244E, H2-KE4, HKE4, KE4, RING5, ZIP7	solute carrier family 39 member 7
282679	AQP11	AQPX1	aquaporin 11
5966	REL	C-Rel, HIVEN86A, IMD92	REL proto-oncogene, NF-kB subunit
11009	IL24	C49A, FISP, IL10B, MDA7, MOB5, ST16	interleukin 24
347	APOD		apolipoprotein D
3291	HSD11B2	AME, AME1, HSD11K, HSD2, SDR9C3	hydroxysteroid 11-beta dehydrogenase 2
1984	EIF5A	EIF-5A1, FABAS, eIF-4D, eIF5AI, EIF5A	eukaryotic translation initiation factor 5A
383	ARG1		arginase 1
368	ABCC6	ABC34, ARA, EST349056, GACI2, MLP1, MOAT-E, MOATE, MRP6, PXE, PXE1, URG7	ATP binding cassette subfamily C member 6
4036	LRP2	DBS, GP330, LRP-2	LDL receptor related protein 2
4254	KITLG	DCUA, DFNA69, FPH2, FPHH, KL-1, Kitl, MGF, SCF, SF, SHEP7, SLF, WS2F	KIT ligand
3992	FADS1	D5D, FADS6, FADSD5, LLCDL1, TU12	fatty acid desaturase 1
5924	RASGRF2	GRF2, RAS-GRF2	Ras protein specific guanine nucleotide releasing factor 2
8767	RIPK2	CARD3, CARDIAK, CCK, GIG30, RICK, RIP2	receptor interacting serine/threonine kinase 2
51128	SAR1B	ANDD, CMRD, GTBPB, SARA2	secretion associated Ras related GTPase 1B
123	PLIN2	ADFP, ADRP	perilipin 2
1388	ATF6B	CREB-RP, CREBL1, G13	activating transcription factor 6 beta
8772	FADD	GIG3, IMD90, MORT1	Fas associated via death domain
7038	TG	AITD3N, TG	thyroglobulin
7314	UBB	HEL-S-50	ubiquitin B
51280	GOLM1	C9orf155, GOLPH2, GP73, HEL46, PSEC0257, bA379P1.3	golgi membrane protein 1
8824	CES2	CE-2A1, PCE-2, iCE, CES2	carboxylesterase 2
6741	SSB	LARP3, La, La/SSB	small RNA binding exonuclease protection factor La
56339	METTL3	IME4, M6A, MT-A70, Spo8, hMETTL3	methyltransferase 3, N6-adenosine-methyltransferase complex catalytic subunit
84919	PPP1R15B	CREP, MSSGM2	protein phosphatase 1 regulatory subunit 15B
23770	FKBP8	FKBP38, FKBPr38	FKBP prolyl isomerase 8
659	BMPR2	BMPR-II, BMPR3, BMR2, BRK-3, POVD1, PPH1, T-ALK	bone morphogenetic protein receptor type 2
259	AMBP	A1M, EDC1, HCP, HI30, IATIL, ITI, ITIL, ITILC, UTI	alpha-1-microglobulin/bikunin precursor
3783	KCNN4	DHS2, IK, IK1, IKCA1, KCA4, KCa3.1, SK4, hIKCa1, hKCa4, hSK4	potassium calcium-activated channel subfamily N member 4
407007	MIR222	MIRN222, miRNA222, mir-222	microRNA 222
100506742	CASP12	CASP-12P1, CASP12	caspase 12 (gene/pseudogene)
406988	MIR205	MIRN205, mir-205	microRNA 205
7356	SCGB1A1	CC10, CC16, CCPBP, CCSP, UGB, UP-1, UP1	secretoglobin family 1A member 1
151	ADRA2B	ADRA2L1, ADRA2RL1, ADRARL1, ALPHA2BAR, FAME2, alpha-2BAR	adrenoceptor alpha 2B
1131	CHRM3	EGBRS, HM3, PBS	cholinergic receptor muscarinic 3
1236	CCR7	BLR2, CC-CKR-7, CCR-7, CD197, CDw197, CMKBR7, EBI1	C-C motif chemokine receptor 7
11345	GABARAPL2	ATG8, ATG8C, GATE-16, GATE16, GEF-2, GEF2	GABA type A receptor associated protein like 2
4082	MARCKS	80K-L, MACS, PKCSL, PRKCSL	myristoylated alanine rich protein kinase C substrate
2328	FMO3	FMOII, TMAU, dJ127D3.1	flavin containing dimethylaniline monoxygenase 3
6194	RPS6	S6	ribosomal protein S6
23400	ATP13A2	CLN12, HSA9947, KRPPD, PARK9, SPG78	ATPase cation transporting 13A2
6480	ST6GAL1	CDw75, SIAT1, ST6GalI, ST6N	ST6 beta-galactoside alpha-2,6-sialyltransferase 1
8549	LGR5	FEX, GPR49, GPR67, GRP49, HG38	leucine rich repeat containing G protein-coupled receptor 5
27032	ATP2C1	ATP2C1A, BCPM, HHD, PMR1, SPCA1, hSPCA1	ATPase secretory pathway Ca2+ transporting 1
6272	SORT1	Gp95, LDLCQ6, NT3, NTR3	sortilin 1
55851	PSENEN	ACNINV2, MDS033, MSTP064, PEN-2, PEN2	presenilin enhancer, gamma-secretase subunit
1072	CFL1	CFL, HEL-S-15, cofilin	cofilin 1
10206	TRIM13	CAR, DLEU5, LEU5, RFP2, RNF77	tripartite motif containing 13
2180	ACSL1	ACS1, FACL1, FACL2, LACS, LACS1, LACS2	acyl-CoA synthetase long chain family member 1
3163	HMOX2	HO-2	heme oxygenase 2
2181	ACSL3	ACS3, FACL3, LACS 3, LACS3, PRO2194	acyl-CoA synthetase long chain family member 3
55054	ATG16L1	APG16L, ATG16A, ATG16L, IBD10, WDR30	autophagy related 16 like 1
406907	MIR124-1	MIR124A, MIR124A1, MIRN124-1, MIRN124A1, mir-124-1	microRNA 124-1
26058	GIGYF2	GYF2, PARK11, PERQ2, PERQ3, TNRC15	GRB10 interacting GYF protein 2
29914	UBIAD1	SCCD, TERE1	UbiA prenyltransferase domain containing 1
2023	ENO1	ENO1L1, HEL-S-17, MPB1, NNE, PPH	enolase 1
1910	EDNRB	ABCDS, ET-B, ET-BR, ETB, ETB1, ETBR, ETRB, HSCR, HSCR2, WS4A	endothelin receptor type B
3709	ITPR2	ANHD, CFAP48, INSP3R2, IP3R2	inositol 1,4,5-trisphosphate receptor type 2
336	APOA2	Apo-AII, ApoA-II, apoAII	apolipoprotein A2
623	BDKRB1	B1BKR, B1R, BKB1R, BKR1, BRADYB1	bradykinin receptor B1
406893	MIR101-1	MIRN101-1, mir-101-1	microRNA 101-1
208	AKT2	HIHGHH, PKBB, PKBBETA, PRKBB, RAC-BETA	AKT serine/threonine kinase 2
2882	GPX7	CL683, GPX6, GPx-7, GSHPx-7, NPGPx	glutathione peroxidase 7
6121	RPE65	BCO3, LCA2, RP20, mRPE65, p63, rd12, sRPE65	retinoid isomerohydrolase RPE65
6732	SRPK1	SFRSK1	SRSF protein kinase 1
54870	QRICH1	AB-DIP, VERBRAS	glutamine rich 1
2550	GABBR1	GABABR1-3, GB1, GPRC3A, GABBR1	gamma-aminobutyric acid type B receptor subunit 1
3909	LAMA3	BM600, E170, JEB2A, JEB2B, JEB2C, LAMNA, LOCS	laminin subunit alpha 3
9619	ABCG1	ABC8, WHITE1	ATP binding cassette subfamily G member 1
54708	MARCHF5	MARCH-V, MARCH5, MITOL, RNF153	membrane associated ring-CH-type finger 5
8826	IQGAP1	HUMORFA01, SAR1, p195	IQ motif containing GTPase activating protein 1
153090	DAB2IP	AF9Q34, AIP-1, AIP1, DIP1/2	DAB2 interacting protein
9235	IL32	IL-32alpha, IL-32beta, IL-32delta, IL-32gamma, NK4, TAIF, TAIFa, TAIFb, TAIFc, TAIFd	interleukin 32
831	CAST	BS-17, PLACK	calpastatin
5062	PAK2	KNO2, PAK65, PAKgamma	p21 (RAC1) activated kinase 2
4855	NOTCH4	INT3	notch receptor 4
3745	KCNB1	DEE26, DRK1, Kv2.1	potassium voltage-gated channel subfamily B member 1
6777	STAT5B	GHISID2, STAT5	signal transducer and activator of transcription 5B
288	ANK3	ANKYRIN-G, MRT37	ankyrin 3
79971	WLS	C1orf139, EVI, GPR177, MRP, ZKS, mig-14	Wnt ligand secretion mediator
890	CCNA2	CCN1, CCNA	cyclin A2
11231	SEC63	DNAJC23, ERdj2, PCLD2, PRO2507L, SEC63	SEC63 homolog, protein translocation regulator
3827	KNG1	BDK, BK, HAE6, HK, HMWK, KNG	kininogen 1
7837	PXDN	ASGD7, COPOA, D2S448, D2S448E, MG50, PRG2, PXN, VPO, hsPxd01	peroxidasin
1393	CRHBP	CRF-BP, CRFBP	corticotropin releasing hormone binding protein
6228	RPS23	BTDD, MABAS, MCINS, PAMAS, S23, uS12	ribosomal protein S23
823	CAPN1	CANP, CANP1, CANPL1, SPG76, muCANP, muCL	calpain 1
4772	NFATC1	NF-ATC, NF-ATc1.2, NFAT2, NFATc	nuclear factor of activated T cells 1
378884	NHLRC1	EPM2A, EPM2B, MALIN, bA204B7.2	NHL repeat containing E3 ubiquitin protein ligase 1
9536	PTGES	MGST-IV, MGST1-L1, MGST1L1, MPGES, PGES, PIG12, PP102, PP1294, TP53I12, mPGES-1	prostaglandin E synthase
1460	CSNK2B	CK2B, CK2N, CSK2B, Ckb1, Ckb2, G5A, POBINDS	casein kinase 2 beta
56848	SPHK2	SK 2, SK-2, SPK 2, SPK-2	sphingosine kinase 2
10131	TRAP1	HSP 75, HSP75, HSP90L, TRAP-1	TNF receptor associated protein 1
10211	FLOT1		flotillin 1
22846	VASH1	KIAA1036, TTCP 1	vasohibin 1
26003	GORASP2	GOLPH6, GRASP55, GRS2, p59	golgi reassembly stacking protein 2
2548	GAA	LYAG	alpha glucosidase
5338	PLD2	PLD1C	phospholipase D2
5564	PRKAB1	AMPK, HAMPKb	protein kinase AMP-activated non-catalytic subunit beta 1
8660	IRS2	IRS-2	insulin receptor substrate 2
7905	REEP5	C5orf18, D5S346, DP1, POB16, TB2, YOP1, Yip2e	receptor accessory protein 5
6098	ROS1	MCF3, ROS, c-ros-1	ROS proto-oncogene 1, receptor tyrosine kinase
7416	VDAC1	PORIN, VDAC-1	voltage dependent anion channel 1
30009	TBX21	IMD88, T-PET, T-bet, TBET, TBLYM	T-box transcription factor 21
10452	TOMM40	C19orf1, D19S1177E, PER-EC1, PEREC1, TOM40	translocase of outer mitochondrial membrane 40
6235	RPS29	DBA13, S29, uS14	ribosomal protein S29
79876	UBA5	DEE44, EIEE44, SCAR24, THIFP1, UBE1DC1	ubiquitin like modifier activating enzyme 5
7879	RAB7A	CMT2B, PRO2706, RAB7	RAB7A, member RAS oncogene family
55000	TUG1	LINC00080, NCRNA00080, TI-227H	taurine up-regulated 1
253827	MSRB3	DFNB74	methionine sulfoxide reductase B3
4923	NTSR1	NTR	neurotensin receptor 1
9024	BRSK2	C11orf7, PEN11B, SAD-A, SAD1, SADA, STK29	BR serine/threonine kinase 2
5337	PLD1	CVDD, CVDP1	phospholipase D1
427	ASAH1	AC, ACDase, ASAH, PHP, PHP32, SMAPME	N-acylsphingosine amidohydrolase 1
10652	YKT6		YKT6 v-SNARE homolog
53905	DUOX1	LNOX1, NOXEF1, THOX1	dual oxidase 1
406950	MIR16-1	MIRN16-1, miRNA16-1, mir-16-1	microRNA 16-1
4504	MT3	GIF, GIFB, GRIF, ZnMT3	metallothionein 3
5074	PAWR	PAR4, Par-4	pro-apoptotic WT1 regulator
140809	SRXN1	C20orf139, Npn3, SRX, SRX1	sulfiredoxin 1
574411	MIR451A	MIR451, MIRN451, hsa-mir-451, hsa-mir-451a, mir-451a	microRNA 451a
218	ALDH3A1	ALDH3, ALDHIII	aldehyde dehydrogenase 3 family member A1
406983	MIR200A	MIRN200A, mir-200a	microRNA 200a
3301	DNAJA1	DJ-2, DjA1, HDJ2, HSDJ, HSJ-2, HSJ2, HSPF4, NEDD7, hDJ-2	DnaJ heat shock protein family (Hsp40) member A1
11096	ADAMTS5	ADAM-TS 11, ADAM-TS 5, ADAM-TS5, ADAMTS-11, ADAMTS-5, ADAMTS11, ADMP-2	ADAM metallopeptidase with thrombospondin type 1 motif 5
1734	DIO2	5DII, D2, DIOII, SELENOY, SelY, TXDI2	iodothyronine deiodinase 2
322	APBB1	FE65, MGC:9072, RIR	amyloid beta precursor protein binding family B member 1
6546	SLC8A1	NCX1	solute carrier family 8 member A1
55503	TRPV6	ABP/ZF, CAT1, CATL, ECAC2, HRPTTN, HSA277909, LP6728, ZFAB	transient receptor potential cation channel subfamily V member 6
5954	RCN1	HEL-S-84, PIG20, RCAL, RCN	reticulocalbin 1
382	ARF6		ADP ribosylation factor 6
54361	WNT4	SERKAL, WNT-4	Wnt family member 4
3482	IGF2R	CD222, CI-M6PR, CIMPR, M6P-R, M6P/IGF2R, MPR 300, MPR1, MPR300, MPRI	insulin like growth factor 2 receptor
23327	NEDD4L	NEDD4-2, NEDD4.2, PVNH7, RSP5, hNEDD4-2	NEDD4 like E3 ubiquitin protein ligase
5122	PCSK1	BMIQ12, NEC1, PC1, PC1/3, PC3, SPC3	proprotein convertase subtilisin/kexin type 1
9261	MAPKAPK2	MAPKAP-K2, MK-2, MK2	MAPK activated protein kinase 2
7317	UBA1	A1S9, A1S9T, A1ST, AMCX1, CFAP124, GXP1, POC20, SMAX2A, UBE1, UBE1X, VEXAS, UBA1	ubiquitin like modifier activating enzyme 1
3280	HES1	HES-1, HHL, HRY, bHLHb39	hes family bHLH transcription factor 1
10017	BCL2L10	BCL-B, Boo, Diva, bcl2-L-10	BCL2 like 10
5910	RAP1GDS1	GDS1, SmgGDS	Rap1 GTPase-GDP dissociation stimulator 1
1859	DYRK1A	DYRK, DYRK1, HP86, MNB, MNBH, MRD7	dual specificity tyrosine phosphorylation regulated kinase 1A
10484	SEC23A	CLSD, hSec23A	SEC23 homolog A, COPII coat complex component
48	ACO1	ACONS, HEL60, IREB1, IREBP, IREBP1, IRP1	aconitase 1
239	ALOX12	12-LOX, 12S-LOX, LOG12	arachidonate 12-lipoxygenase, 12S type
84236	RHBDD1	RHBDL4, RRP4	rhomboid domain containing 1
55908	ANGPTL8	C19orf80, PRO1185, PVPA599, RIFL, TD26	angiopoietin like 8
1655	DDX5	G17P1, HLR1, HUMP68, p68	DEAD-box helicase 5
729238	SFTPA2	COLEC5, ILD2, PSAP, PSP-A, PSPA, SFTP1B, SP-2A, SP-A, SPA2, SPAII, SFTPA2	surfactant protein A2
6009	RHEB	RHEB2	Ras homolog, mTORC1 binding
4644	MYO5A	GS1, MYH12, MYO5, MYR12	myosin VA
3811	KIR3DL1	CD158E1, KIR, KIR2DL5B/S1, NKAT-3, NKAT3, NKB1, NKB1B, KIR3DL1	killer cell immunoglobulin like receptor, three Ig domains and long cytoplasmic tail 1
253782	CERS6	CERS5, LASS6	ceramide synthase 6
83636	C19orf12	MPAN, NBIA3, NBIA4, SPG43	chromosome 19 open reading frame 12
407026	MIR29C	MIRN29C, miRNA29C, mir-29c	microRNA 29c
359	AQP2	AQP-CD, NDI2, WCH-CD	aquaporin 2
5046	PCSK6	PACE4, SPC4	proprotein convertase subtilisin/kexin type 6
9965	FGF19		fibroblast growth factor 19
407015	MIR26A1	MIR26A, MIRN26A1, mir-26a-1	microRNA 26a-1
7311	UBA52	CEP52, HUBCEP52, L40, RPL40	ubiquitin A-52 residue ribosomal protein fusion product 1
5446	PON3		paraoxonase 3
10869	USP19	ZMYND9	ubiquitin specific peptidase 19
4257	MGST1	GST12, MGST, MGST-I, PMAN	microsomal glutathione S-transferase 1
81631	MAP1LC3B	ATG8F, LC3B, MAP1A/1BLC3-a, MAP1LC3B	microtubule associated protein 1 light chain 3 beta
407037	MIR320A	MIRN320, MIRN320A, hsa-mir-320a, mir-320a	microRNA 320a
126129	CPT1C	CATL1, CPT1-B, CPT1P, CPTI-B, CPTIC, SPG73	carnitine palmitoyltransferase 1C
5923	RASGRF1	CDC25, CDC25L, GNRP, GRF1, GRF55, H-GRF55, PP13187, ras-GRF1	Ras protein specific guanine nucleotide releasing factor 1
1081	CGA	CG-ALPHA, FSHA, GPA1, GPHA1, GPHa, HCG, LHA, TSHA	glycoprotein hormones, alpha polypeptide
80279	CDK5RAP3	C53, HSF-27, IC53, LZAP, MST016, OK/SW-cl.114, PP1553	CDK5 regulatory subunit associated protein 3
378	ARF4	ARF2	ADP ribosylation factor 4
406884	MIRLET7B	LET7B, MIRNLET7B, hsa-let-7b, let-7b	microRNA let-7b
57650	CIP2A	KIAA1524, NOCIVA, p90	cellular inhibitor of PP2A
3170	FOXA2	HNF-3-beta, HNF3B, TCF3B	forkhead box A2
11124	FAF1	CGI-03, HFAF1s, UBXD12, UBXN3A, hFAF1	Fas associated factor 1
3487	IGFBP4	BP-4, HT29-IGFBP, IBP4, IGFBP-4	insulin like growth factor binding protein 4
8000	PSCA	PRO232, lncPSCA	prostate stem cell antigen
5179	PENK	PE-A, PENK	proenkephalin
6717	SRI	CP-22, CP22, SCN, V19	sorcin
1300	COL10A1		collagen type X alpha 1 chain
7178	TPT1	HRF, TCTP, p02, p23	tumor protein, translationally-controlled 1
23471	TRAM1	PNAS8, TRAM, TRAMP	translocation associated membrane protein 1
818	CAMK2G	CAMK, CAMK-II, CAMKG, MRD59	calcium/calmodulin dependent protein kinase II gamma
2773	GNAI3	87U6, ARCND1, HG1A	G protein subunit alpha i3
10733	PLK4	MCCRP2, SAK, STK18	polo like kinase 4
1937	EEF1G	EF1G, GIG35	eukaryotic translation elongation factor 1 gamma
6770	STAR	STARD1	steroidogenic acute regulatory protein
2752	GLUL	GLNS, GS, PIG43, PIG59	glutamate-ammonia ligase
3183	HNRNPC	C1, C2, HNRNP, HNRPC, SNRPC	heterogeneous nuclear ribonucleoprotein C
1284	COL4A2	BSVD2, ICH, POREN2	collagen type IV alpha 2 chain
10162	LPCAT3	C3F, LPCAT, LPLAT 5, LPLAT12, LPSAT, MBOAT5, OACT5, nessy	lysophosphatidylcholine acyltransferase 3
92949	ADAMTSL1	ADAMTSL-1, ADAMTSR1, C9orf94, PUNCTIN	ADAMTS like 1
2861	GPR37	EDNRBL, PAELR, hET(B)R-LP	G protein-coupled receptor 37
7991	TUSC3	D8S1992, M33, MRT22, MRT7, MagT2, N33, OST3A, SLC58A2	tumor suppressor candidate 3
7555	CNBP	CNBP1, DM2, PROMM, RNF163, ZCCHC22, ZNF9	CCHC-type zinc finger nucleic acid binding protein
6623	SNCG	BCSG1, SR	synuclein gamma
2217	FCGRT	FCRN, FcgammaRn, alpha-chain	Fc gamma receptor and transporter
154807	VKORC1L1		vitamin K epoxide reductase complex subunit 1 like 1
1453	CSNK1D	ASPS, CKI-delta, CKId, CKIdelta, FASPS2, HCKID	casein kinase 1 delta
57531	HACE1	SPPRS	HECT domain and ankyrin repeat containing E3 ubiquitin protein ligase 1
950	SCARB2	AMRF, CD36L2, EPM4, HLGP85, LGP85, LIMP-2, LIMPII, SR-BII	scavenger receptor class B member 2
6342	SCP2	NLTP, NSL-TP, SCOX, SCP-2, SCP-CHI, SCP-X, SCPX	sterol carrier protein 2
29904	EEF2K	CaMKIII, HSU93850, eEF-2K	eukaryotic elongation factor 2 kinase
27067	STAU2	39K2, 39K3	staufen double-stranded RNA binding protein 2
10269	ZMPSTE24	FACE-1, FACE1, HGPS, PRO1, RSDM1, STE24, Ste24p	zinc metallopeptidase STE24
1996	ELAVL4	HUD, PNEM	ELAV like RNA binding protein 4
284119	CAVIN1	CAVIN, CGL4, FKSG13, PTRF, cavin-1	caveolae associated protein 1
665	BNIP3L	BNIP3a, NIX	BCL2 interacting protein 3 like
1459	CSNK2A2	CK2A2, CK2alpha', CSNK2A1	casein kinase 2 alpha 2
253017	TECRL	CPVT3, GPSN2L, SRD5A2L2, TERL	trans-2,3-enoyl-CoA reductase like
11342	RNF13	DEE73, EIEE73, RZF	ring finger protein 13
1831	TSC22D3	DIP, DSIPI, GILZ, TSC-22R	TSC22 domain family member 3
81037	CLPTM1L	CRR9	CLPTM1 like
2326	FMO1		flavin containing dimethylaniline monoxygenase 1
3359	HTR3A	5-HT-3, 5-HT3A, 5-HT3R, 5HT3R, HTR3	5-hydroxytryptamine receptor 3A
2530	FUT8	CDGF, CDGF1	fucosyltransferase 8
4481	MSR1	CD204, SCARA1, SR-A, SR-AI, SR-AII, SR-AIII, SRA, phSR1, phSR2	macrophage scavenger receptor 1
160418	TMTC3	LIS8, SMILE	transmembrane O-mannosyltransferase targeting cadherins 3
406961	MIR185	MIRN185, miR-185	microRNA 185
30818	KCNIP3	CSEN, DREAM, KCHIP3	potassium voltage-gated channel interacting protein 3
5716	PSMD10	dJ889N15.2, p28, p28(GANK)	proteasome 26S subunit, non-ATPase 10
51124	IER3IP1	HSPC039, MEDS, PRO2309	immediate early response 3 interacting protein 1
55627	SMPD4	NEDMABA, NEDMEBA, NET13, NSMASE-3, NSMASE3, SKNY	sphingomyelin phosphodiesterase 4
51185	CRBN	MRT2, MRT2A	cereblon
89885	FATE1	CT43, FATE	fetal and adult testis expressed 1
1491	CTH	CGL, CSE	cystathionine gamma-lyase
6286	S100P	MIG9	S100 calcium binding protein P
8893	EIF2B5	CACH, CLE, EIF-2B, EIF2Bepsilon, LVWM	eukaryotic translation initiation factor 2B subunit epsilon
345611	IRGM	IFI11, LRG-47, LRG47, IRGM	immunity related GTPase M
51763	INPP5K	MDCCAID, PPS, SKIP	inositol polyphosphate-5-phosphatase K
5732	PTGER2	EP2	prostaglandin E receptor 2
23192	ATG4B	APG4B, AUTL1, HsAPG4B	autophagy related 4B cysteine peptidase
23197	FAF2	ETEA, UBXD8, UBXN3B	Fas associated factor family member 2
494327	MIR378A	MIR378, MIRN378, hsa-mir-378, hsa-mir-378a, miRNA378	microRNA 378a
8065	CUL5	CUL-5, VACM-1, VACM1	cullin 5
4069	LYZ	LYZF1, LZM	lysozyme
5873	RAB27A	GS2, HsT18676, RAB27, RAM	RAB27A, member RAS oncogene family
25825	BACE2	AEPLC, ALP56, ASP1, ASP21, BAE2, CDA13, CEAP1, DRAP	beta-secretase 2
80328	ULBP2	ALCAN-alpha, N2DL2, NKG2DL2, RAET1H, RAET1L	UL16 binding protein 2
2770	GNAI1	Gi, HG1B, NEDHISB	G protein subunit alpha i1
406993	MIR211	MIRN211, mir-211	microRNA 211
87178	PNPT1	COXPD13, DFNB70, OLD35, PNPASE, SCA25, old-35	polyribonucleotide nucleotidyltransferase 1
1114	CHGB	SCG1	chromogranin B
56246	MRAP	B27, C21orf61, FALP, FGD2, GCCD2	melanocortin 2 receptor accessory protein
116150	NUS1	C6orf68, CDG1AA, MGC:7199, MRD55, NgBR, TANGO14	NUS1 dehydrodolichyl diphosphate synthase subunit
7130	TNFAIP6	TSG-6, TSG6	TNF alpha induced protein 6
10445	MCRS1	ICP22BP, INO80Q, MCRS2, MSP58, P78	microspherule protein 1
23643	LY96	ESOP-1, MD-2, MD2, ly-96	lymphocyte antigen 96
9547	CXCL14	BMAC, BRAK, KEC, KS1, MIP-2g, MIP2G, NJAC, SCYB14	C-X-C motif chemokine ligand 14
116085	SLC22A12	OAT4L, RST, URAT1	solute carrier family 22 member 12
4985	OPRD1	DOP, DOR, DOR1, OPRD	opioid receptor delta 1
1776	DNASE1L3	DHP2, DNAS1L3, LSD, SLEB16	deoxyribonuclease 1 like 3
224	ALDH3A2	ALDH10, FALDH, SLS	aldehyde dehydrogenase 3 family member A2
5967	REG1A	ICRF, P19, PSP, PSPS, PSPS1, PTP, REG	regenerating family member 1 alpha
1488	CTBP2		C-terminal binding protein 2
8560	DEGS1	DEGS, DEGS-1, DES1, Des-1, FADS7, HLD18, MIG15, MLD	delta 4-desaturase, sphingolipid 1
1834	DSPP	DFNA39, DGI1, DMP3, DPP, DSP	dentin sialophosphoprotein
23753	SDF2L1		stromal cell derived factor 2 like 1
7957	EPM2A	EPM2, MELF	EPM2A glucan phosphatase, laforin
6233	RPS27A	CEP80, HEL112, S27A, UBA80, UBC, UBCEP1, UBCEP80	ribosomal protein S27a
5516	PPP2CB	PP2Abeta, PP2CB	protein phosphatase 2 catalytic subunit beta
8694	DGAT1	ARAT, ARGP1, DGAT, DIAR7	diacylglycerol O-acyltransferase 1
8692	HYAL2	LUCA2	hyaluronidase 2
11331	PHB2	BAP, BCAP37, Bap37, PNAS-141, REA, hBAP, p22	prohibitin 2
29761	USP25	USP21	ubiquitin specific peptidase 25
10458	BAIAP2	BAP2, FLAF3, IRSP53, WAML	BAR/IMD domain containing adaptor protein 2
3988	LIPA	CESD, LAL	lipase A, lysosomal acid type
1056	CEL	BAL, BSDL, BSSLL, CEase, FAP, FAPP, LIPA, MODY8, CEL	carboxyl ester lipase
6610	SMPD2	ISC1, NSMASE, NSMASE1	sphingomyelin phosphodiesterase 2
11320	MGAT4A	GNT-IV, GNT-IVA, GnT-4a	alpha-1,3-mannosyl-glycoprotein 4-beta-N-acetylglucosaminyltransferase A
287	ANK2	ANK-2, CFAP87, FAP87, LQT4, brank-2	ankyrin 2
8406	SRPX	DRS, ETX1, HEL-S-83p1, SRPX	sushi repeat containing protein X-linked
1733	DIO1	5DI, THMA2, TXDI1	iodothyronine deiodinase 1
5355	PLP2	A4, A4LSB	proteolipid protein 2
2993	GYPA	CD235a, GPA, GPErik, GPSAT, HGpMiV, HGpMiXI, HGpSta(C), MN, MNS, PAS-2	glycophorin A (MNS blood group)
442908	MIR340	MIRN340, hsa-mir-340, mir-340	microRNA 340
1395	CRHR2	CRF-RB, CRF2, CRFR2, HM-CRF	corticotropin releasing hormone receptor 2
440	ASNS	ASNSD, TS11	asparagine synthetase (glutamine-hydrolyzing)
90411	MCFD2	F5F8D, F5F8D2, LMAN1IP, SDNSF	multiple coagulation factor deficiency 2, ER cargo receptor complex subunit
10193	RNF41	FLRF, NRDP1, SBBI03	ring finger protein 41
54788	DNAJB12	DJ10	DnaJ heat shock protein family (Hsp40) member B12
145226	RDH12	LCA13, RP53, SDR7C2	retinol dehydrogenase 12
7436	VLDLR	CAMRQ1, CARMQ1, CHRMQ1, VLDL-RCH, VLDLR	very low density lipoprotein receptor
27433	TOR2A	TORP1	torsin family 2 member A
91304	TMEM259	ASBABP1, C19orf6, MBRL, MEMBRALIN, R32184_3	transmembrane protein 259
4641	MYO1C	MMI-beta, MMIb, MyoIC, NMI, myr2	myosin IC
83939	EIF2A	CDA02, EIF-2A, MST089, MSTP004, MSTP089	eukaryotic translation initiation factor 2A
7086	TKT	HEL-S-48, HEL107, SDDHD, TK1, TKT	transketolase
10578	GNLY	D2S69E, LAG-2, LAG2, NKG5, TLA519	granulysin
3782	KCNN3	KCa2.3, SK3, SKCA3, ZLS3, hSK3	potassium calcium-activated channel subfamily N member 3
54546	RNF186		ring finger protein 186
5887	RAD23B	HHR23B, HR23B, P58	RAD23 homolog B, nucleotide excision repair protein
10808	HSPH1	HSP105, HSP105A, HSP105B, NY-CO-25	heat shock protein family H (Hsp110) member 1
56975	FAM20C	DMP-4, DMP4, G-CK, GEF-CK, RNS	FAM20C golgi associated secretory pathway kinase
23392	ECPAS	ECM29, KIAA0368	Ecm29 proteasome adaptor and scaffold
537	ATP6AP1	16A, ATP6IP1, ATP6S1, Ac45, CF2, VATPS1, XAP-3, XAP3	ATPase H+ transporting accessory protein 1
6529	SLC6A1	GABATHG, GABATR, GAT1, MAE, hGAT-1	solute carrier family 6 member 1
80329	ULBP1	N2DL-1, NKG2DL1, RAET1I	UL16 binding protein 1
54495	TMX3	PDIA13, TXNDC10	thioredoxin related transmembrane protein 3
6164	RPL34	L34	ribosomal protein L34
338557	FFAR4	BMIQ10, GPR120, GPR129, GT01, O3FAR1, PGR4	free fatty acid receptor 4
746	TMEM258	C11orf10, Kud, Kuduk	transmembrane protein 258
4308	TRPM1	CSNB1C, LTRPC1, MLSN1	transient receptor potential cation channel subfamily M member 1
5631	PRPS1	ARTS, CMTX5, DFN2, DFNX1, PPRibP, PRS-I, PRSI	phosphoribosyl pyrophosphate synthetase 1
26060	APPL1	APPL, DIP13alpha, MODY14	adaptor protein, phosphotyrosine interacting with PH domain and leucine zipper 1
6557	SLC12A1	BSC, BSC-1, BSC1, CCC2, NKCC2	solute carrier family 12 member 1
56776	FMN2		formin 2
64798	DEPTOR	DEP.6, DEPDC6	DEP domain containing MTOR interacting protein
2617	GARS1	CMT2D, DSMAV, GARS, GlyRS, HMN5, HMN5A, SMAD1, SMAJI	glycyl-tRNA synthetase 1
1363	CPE	BDVS, CPH, IDDHH	carboxypeptidase E
64423	INF2	C14orf151, C14orf173, CMTDIE, FSGS5, pp9484	inverted formin 2
9479	MAPK8IP1	IB1, JIP-1, JIP1, PRKM8IP	mitogen-activated protein kinase 8 interacting protein 1
116496	NIBAN1	C1orf24, FAM129A, GIG39, NIBAN	niban apoptosis regulator 1
63924	CIDEC	CIDE-3, CIDE3, FPLD5, FSP27	cell death inducing DFFA like effector c
493869	GPX8	EPLA847, GPx-8, GSHPx-8, UNQ847	glutathione peroxidase 8 (putative)
1119	CHKA	CHK, CK, CKI, EK, NEDMIMS	choline kinase alpha
11221	DUSP10	MKP-5, MKP5	dual specificity phosphatase 10
51384	WNT16		Wnt family member 16
55611	OTUB1	HSPC263, OTB1, OTU1	OTU deubiquitinase, ubiquitin aldehyde binding 1
9456	HOMER1	HOMERA, HOMER1B, HOMER1C, SYN47, Ves-1, HOMER1	homer scaffold protein 1
638	BIK	BIP1, BP4, NBK	BCL2 interacting killer
51150	SDF4	Cab45, SDF-4	stromal cell derived factor 4
5414	SEPTIN4	ARTS, BRADEION, C17orf47, CE5B3, H5, MART, PNUTL2, SEP4, SEPT4, hCDCREL-2, hucep-7	septin 4
221	ALDH3B1	ALDH4, ALDH7	aldehyde dehydrogenase 3 family member B1
2673	GFPT1	CMS12, CMSTA1, GFA, GFAT, GFAT 1, GFAT1, GFAT1m, GFPTL, MSLG, GFPT1	glutamine--fructose-6-phosphate transaminase 1
114882	OSBPL8	MST120, MSTP120, ORP8, OSBP10	oxysterol binding protein like 8
8547	FCN3	FCNH, HAKA1	ficolin 3
9562	MINPP1	HIPER1, MINPP2, MIPP, PCH16	multiple inositol-polyphosphate phosphatase 1
22818	COPZ1	CGI-120, COPZ, HSPC181, zeta-COP, zeta1-COP	COPI coat complex subunit zeta 1
635	BHMT	BHMT1, HEL-S-61p	betaine--homocysteine S-methyltransferase
9776	ATG13	KIAA0652, PARATARG8	autophagy related 13
162514	TRPV3	FNEPPK2, OLMS, OLMS1, VRL3	transient receptor potential cation channel subfamily V member 3
957	ENTPD5	CD39L4, NTPDase-5, PCPH	ectonucleoside triphosphate diphosphohydrolase 5 (inactive)
7353	UFD1	UFD1L	ubiquitin recognition factor in ER associated degradation 1
494330	MIR381	MIRN381, hsa-mir-381, mir-381	microRNA 381
1261	CNGA3	ACHM2, CCNC1, CCNCa, CCNCalpha, CNCG3, CNG3	cyclic nucleotide gated channel subunit alpha 3
55210	ATAD3A	HAYOS, PHRINL	ATPase family AAA domain containing 3A
1303	COL12A1	BA209D8.1, BTHLM2L, DJ234P15.1, EDSMYP, UCMD2, COL12A1	collagen type XII alpha 1 chain
23239	PHLPP1	PHLPP, PLEKHE1, PPM3A, SCOP	PH domain and leucine rich repeat protein phosphatase 1
5274	SERPINI1	HNS-S1, HNS-S2, PI12, neuroserpin	serpin family I member 1
11153	FICD	HIP13, HYPE, UNQ3041	FIC domain protein adenylyltransferase
1620	BRINP1	DBC1, DBCCR1, FAM5A	BMP/retinoic acid inducible neural specific 1
9589	WTAP	Mum2	WT1 associated protein
128674	PROKR2	GPR73L1, GPR73b, GPRg2, HH3, KAL3, PKR2, dJ680N4.3	prokineticin receptor 2
144811	LACC1	C13orf31, FAMIN, JUVAR	laccase domain containing 1
5106	PCK2	PEPCK, PEPCK-M, PEPCK2	phosphoenolpyruvate carboxykinase 2, mitochondrial
6431	SRSF6	B52, HEL-S-91, SFRS6, SRP55	serine and arginine rich splicing factor 6
23516	SLC39A14	HCIN, HMNDYT2, LZT-Hs4, NET34, ZIP14, cig19	solute carrier family 39 member 14
51465	UBE2J1	CGI-76, HSPC153, HSPC205, HSU93243, NCUBE-1, NCUBE1, UBC6, UBC6E, Ubc6p	ubiquitin conjugating enzyme E2 J1
116071	BATF2	SARI	basic leucine zipper ATF-like transcription factor 2
51506	UFC1	HSPC155, NEDSG	ubiquitin-fold modifier conjugating enzyme 1
441549	CDNF	ARMETL1	cerebral dopamine neurotrophic factor
64223	MLST8	GBL, GbetaL, LST8, POP3, WAT1	MTOR associated protein, LST8 homolog
81537	SGPP1	SPP-1, SPPase1	sphingosine-1-phosphate phosphatase 1
26086	GPSM1	AGS3	G protein signaling modulator 1
728441	GGT2P	GGT, GGT 2, GGT2	gamma-glutamyltransferase 2, pseudogene
115209	OMA1	2010001O09Rik, DAB1, MPRP-1, MPRP1, YKR087C, ZMPOMA1, peptidase	OMA1 zinc metallopeptidase
27338	UBE2S	E2-EPF, E2EPF, EPF5	ubiquitin conjugating enzyme E2 S
2707	GJB3	CX31, DFNA2, DFNA2B, EKV, EKVP1	gap junction protein beta 3
23235	SIK2	LOH11CR1I, QIK, SIK-2, SNF1LK2	salt inducible kinase 2
406951	MIR16-2	MIRN16-2, mir-16-2, mir-16-3	microRNA 16-2
6746	SSR2	HSD25, TLAP, TRAP-BETA, TRAPB	signal sequence receptor subunit 2
7375	USP4	UNP, Unph	ubiquitin specific peptidase 4
3950	LECT2	chm-II, chm2	leukocyte cell derived chemotaxin 2
793	CALB1	CALB, D-28K	calbindin 1
3324	HSP90AA2P	HSP90AA2, HSP90ALPHA, HSPCA, HSPCAL3	heat shock protein 90 alpha family class A member 2, pseudogene
80762	NDFIP1	N4WBP5	Nedd4 family interacting protein 1
23035	PHLPP2	PHLPPL, PPM3B	PH domain and leucine rich repeat protein phosphatase 2
23413	NCS1	FLUP, FREQ	neuronal calcium sensor 1
3347	HTN3	HIS2, HTN2, HTN5, PB	histatin 3
160335	TMTC2	IBDBP1	transmembrane O-mannosyltransferase targeting cadherins 2
23640	HSPBP1	FES1	HSPA (Hsp70) binding protein 1
57414	RHBDD2	NPD007, RHBDL7	rhomboid domain containing 2
4666	NACA	HSD48, NAC-alpha1, skNAC, NACA	nascent polypeptide associated complex subunit alpha
54867	TMEM214		transmembrane protein 214
53353	LRP1B	LRP-1B, LRP-DIT, LRPDIT	LDL receptor related protein 1B
5152	PDE9A	HSPDE9A2	phosphodiesterase 9A
5406	PNLIP	PLD, PTL, PNLIP	pancreatic lipase
3300	DNAJB2	CMT2T, DSMA5, HSJ-1, HSJ1, HSPF3	DnaJ heat shock protein family (Hsp40) member B2
79651	RHBDF2	RHBDL5, RHBDL6, TEC, TOC, TOCG, iRhom2	rhomboid 5 homolog 2
55244	SLC47A1	MATE1	solute carrier family 47 member 1
9603	NFE2L3	NRF3	NFE2 like bZIP transcription factor 3
2108	ETFA	EMA, GA2, MADD	electron transfer flavoprotein subunit alpha
9669	EIF5B	IF2	eukaryotic translation initiation factor 5B
373156	GSTK1	GST, GST 13-13, GST13, GST13-13-1, hGSTK1, GSTK1	glutathione S-transferase kappa 1
9149	DYRK1B	AOMS3, MIRK	dual specificity tyrosine phosphorylation regulated kinase 1B
50640	PNPLA8	IPLA2-2, IPLA2G, MMLA, PNPLA-gamma, iPLA2gamma	patatin like phospholipase domain containing 8
79094	CHAC1		ChaC glutathione specific gamma-glutamylcyclotransferase 1
50846	DHH	GDMN, GDXYM, HHG-3, SRXY7	desert hedgehog signaling molecule
23037	PDZD2	AIPC, PAPIN, PDZK3, PIN1	PDZ domain containing 2
7287	TULP1	LCA15, RP14, TUBL1	TUB like protein 1
11330	CTRC	CLCR, ELA4	chymotrypsin C
9517	SPTLC2	HSN1C, LCB2, LCB2A, NSAN1C, SPT2, hLCB2a	serine palmitoyltransferase long chain base subunit 2
23295	MGRN1	RNF156	mahogunin ring finger 1
6388	SDF2		stromal cell derived factor 2
338872	C1QTNF9	AQL1A, CTRP9, C1QTNF9	C1q and TNF related 9
23678	SGK3	CISK, SGK2, SGKL	serum/glucocorticoid regulated kinase family member 3
84216	TMEM117		transmembrane protein 117
134429	STARD4		StAR related lipid transfer domain containing 4
51734	MSRB1	HSPC270, SELENOR, SELENOX, SELR, SELX, SEPX1, SepR	methionine sulfoxide reductase B1
58487	CREBZF	SMILE, ZF	CREB/ATF bZIP transcription factor
64778	FNDC3B	FAD104, PRO4979, YVTM2421	fibronectin type III domain containing 3B
84867	PTPN5	PTPSTEP, STEP, STEP61	protein tyrosine phosphatase non-receptor type 5
51283	BFAR	BAR, RNF47	bifunctional apoptosis regulator
23395	LARS2	HLASA, LEURS, PRLTS4, mtLeuRS	leucyl-tRNA synthetase 2, mitochondrial
5326	PLAGL2	ZNF900	PLAG1 like zinc finger 2
152831	KLB	BKL	klotho beta
2267	FGL1	HFREP1, HP-041, HPS, LFIRE-1, LFIRE1	fibrinogen like 1
26270	FBXO6	FBG2, FBS2, FBX6, Fbx6b	F-box protein 6
9868	TOMM70	TOMM70A, Tom70	translocase of outer mitochondrial membrane 70
140576	S100A16	AAG13, DT1P1A7, S100F	S100 calcium binding protein A16
55273	TMEM100		transmembrane protein 100
166929	SGMS2	CDL, SMS2	sphingomyelin synthase 2
8459	TPST2	TANGO13B, TPST-2	tyrosylprotein sulfotransferase 2
51714	SELENOT	SELT	selenoprotein T
29982	NRBF2	COPR, COPR1, COPR2, NRBF-2	nuclear receptor binding factor 2
192683	SCAMP5		secretory carrier membrane protein 5
2537	IFI6	6-16, FAM14C, G1P3, IFI-6-1616, IFI6	interferon alpha inducible protein 6
225689	MAPK15	ERK7, ERK8	mitogen-activated protein kinase 15
9527	GOSR1	GOLIM2, GOS-28, GOS28, GOS28/P28, GS28, P28	golgi SNAP receptor complex member 1
1357	CPA1	CPA	carboxypeptidase A1
8396	PIP4K2B	PI5P4KB, PIP5K2B, PIP5KIIB, PIP5KIIbeta, PIP5P4KB	phosphatidylinositol-5-phosphate 4-kinase type 2 beta
11080	DNAJB4	DNAJW, DjB4, HLJ1	DnaJ heat shock protein family (Hsp40) member B4
79174	CRELD2		cysteine rich with EGF like domains 2
726	CAPN5	ADNIV, HTRA3, VRNI, nCL-3	calpain 5
6004	RGS16	A28-RGS14, A28-RGS14P, RGS-R	regulator of G protein signaling 16
8739	HRK	DP5, HARAKIRI	harakiri, BCL2 interacting protein
3270	HRC		histidine rich calcium binding protein
442911	MIR346	MIRN346, hsa-mir-346, miR-346, miRNA346	microRNA 346
1967	EIF2B1	EIF2B, EIF2BA, EIF2Balpha	eukaryotic translation initiation factor 2B subunit alpha
79594	MUL1	C1orf166, GIDE, MAPL, MULAN, RNF218	mitochondrial E3 ubiquitin protein ligase 1
125981	ACER1	ALKCDase1, ASAH3	alkaline ceramidase 1
4123	MAN2C1	CDDG2, MAN6A8, MANA, MANA1	mannosidase alpha class 2C member 1
4826	NNAT	Peg5	neuronatin
51304	ZDHHC3	DHHC-3, DHHC3, GODZ, ZNF373	zinc finger DHHC-type palmitoyltransferase 3
139341	FUNDC1		FUN14 domain containing 1
9390	SLC22A13	OAT10, OCTL1, OCTL3, ORCTL-3, ORCTL3	solute carrier family 22 member 13
137902	PXDNL	PMR1, PRM1, VPO2	peroxidasin like
390502	SERPINA2	ARGS, ATR, PILP, psiATR, SERPINA2	serpin family A member 2 (gene/pseudogene)
2828	GPR4	GPR6C.l	G protein-coupled receptor 4
5833	PCYT2	ET, SPG82	phosphate cytidylyltransferase 2, ethanolamine
9777	TM9SF4	dJ836N17.2	transmembrane 9 superfamily member 4
5634	PRPS2	PRSII	phosphoribosyl pyrophosphate synthetase 2
11328	FKBP9	FKBP60, FKBP63, PPIase	FKBP prolyl isomerase 9
29800	ZDHHC1	C16orf1, DHHC-1, HSU90653, ZNF377	zinc finger DHHC-type containing 1
10811	NOXA1	NY-CO-31, SDCCAG31, p51NOX	NADPH oxidase activator 1
55144	LRRC8D	HsLRRC8D, LRRC5	leucine rich repeat containing 8 VRAC subunit D
79969	ATAT1	C6orf134, MEC17, Nbla00487, TAT, alpha-TAT, alpha-TAT1	alpha tubulin acetyltransferase 1
4799	NFX1	NFX2, TEG-42, Tex42	nuclear transcription factor, X-box binding 1
80131	LRRC8E		leucine rich repeat containing 8 VRAC subunit E
4884	NPTX1	NP1	neuronal pentraxin 1
6941	TCF19	SC1, TCF-19	transcription factor 19
257629	ANKS4B	HARP	ankyrin repeat and sterile alpha motif domain containing 4B
5051	PAFAH2	HSD-PLA2	platelet activating factor acetylhydrolase 2
57535	ELAPOR1	EIG121, KIAA1324	endosome-lysosome associated apoptosis and autophagy regulator 1
55586	MIOX	ALDRL6	myo-inositol oxygenase
25998	IBTK	BTBD26, BTKI	inhibitor of Bruton tyrosine kinase
10486	CAP2		cyclase associated actin cytoskeleton regulatory protein 2
79772	MCTP1		multiple C2 and transmembrane domain containing 1
10955	SERINC3	AIGP1, DIFF33, SBBI99, TDE, TDE1, TMS-1	serine incorporator 3
51368	TEX264	ZSIG11	testis expressed 264, ER-phagy receptor
55578	SUPT20H	C13, C13orf19, FAM48A, FP757, P38IP, SPT20	SPT20 homolog, SAGA complex component
7732	RNF112	BFP, ZNF179	ring finger protein 112
574467	MIR520A	MIRN520A	microRNA 520a
154064	RAET1L	RAET1H, ULBP6	retinoic acid early transcript 1L
23670	CEMIP2	TMEM2	cell migration inducing hyaluronidase 2
83857	TMTC1	ARG99, OLFA, TMTC1	transmembrane O-mannosyltransferase targeting cadherins 1
417	ART1	ART2, ARTC1, CD296, RT6	ADP-ribosyltransferase 1
85453	TSPYL5		TSPY like 5
90637	ZFAND2A	AIRAP	zinc finger AN1-type containing 2A
6675	UAP1	AGX, AGX1, AGX2, SPAG2	UDP-N-acetylglucosamine pyrophosphorylase 1
83729	INHBE		inhibin subunit beta E
80765	STARD5		StAR related lipid transfer domain containing 5
29100	TMEM208	HSPC171, hSND2	transmembrane protein 208
79871	RPAP2	C1orf82, Rtr1	RNA polymerase II associated protein 2
55181	SMG8	ALKUS, C17orf71	SMG8 nonsense mediated mRNA decay factor
9382	COG1	CDG2G, LDLB	component of oligomeric golgi complex 1
85495	RPPH1	H1RNA-1, RPPH1	ribonuclease P RNA component H1
5502	PPP1R1A	I1, IPP1	protein phosphatase 1 regulatory inhibitor subunit 1A
153657	TTC23L	MC25-1	tetratricopeptide repeat domain 23 like
84230	LRRC8C	AD158, FAD158	leucine rich repeat containing 8 VRAC subunit C
574458	MIR512-1	MIRN512-1, mir-512-1	microRNA 512-1
57558	USP35		ubiquitin specific peptidase 35
9812	DELE1	DELE(L), KIAA0141, DELE1	DAP3 binding cell death enhancer 1
100302221	MIR1291	MIRN1291, hsa-mir-1291, mir-1291	microRNA 1291
387263	C6orf120		chromosome 6 open reading frame 120
80006	TRAPPC13	C5orf44, SHLD3	trafficking protein particle complex subunit 13
192343	NEWENTRY		Record to support submission of GeneRIFs for a gene not in Gene (human).
100302259	MIR1202	MIRN1202, hsa-mir-1202	microRNA 1202
221833	SP8	BTD	Sp8 transcription factor
140460	ASB7		ankyrin repeat and SOCS box containing 7
494143	CHAC2	GCG1	ChaC glutathione specific gamma-glutamylcyclotransferase 2
162494	RHBDL3	RHBDL4, VRHO	rhomboid like 3
100302265	MIR1283-1	MIRN1283-1, hsa-mir-1283-1, mir-1283-1	microRNA 1283-1
